# Supplementary material for: Stable d -xylose ditriflate in divergent syntheses of dihydroxy prolines, pyrrolidines, tetrahydrofuran-2-carboxylic acids, and cyclic β-amino acids
Source: Royal Society of Chemistry journal article supplement (doi:10.1039/d2ob01255c), 2022-01-01
Supplement: d2ob01255c1.pdf [file d2ob01255c1.pdf]

# Stable D-xylose ditriflate in divergent syntheses of dihydroxy prolines, pyrrolidines, tetrahydrofuran-2-carboxylic acids, and cyclic $\beta$ -amino acids.

Rosalino Balo,<sup>a</sup> Alberto G. Fernández,<sup>a</sup> Adam Chopdat,<sup>a</sup> Soufian El Ayadi,<sup>a</sup> Atsushi Kato,<sup>c</sup> Ramón J. Estévez,<sup>a, b</sup> George W. J. Fleet,<sup>b,\*</sup> and Juan C. Estévez<sup>a,\*</sup>

- Centro Singular de Investigación en Química Biolóxica e Materiais Moleculares and Departamento de Química Orgánica, Campus Vida, Universidade de Santiago de Compostela, 15782 Santiago de Compostela, SPAIN.
- Chemistry Research Laboratory, Department of Chemistry, University of Oxford, Oxford, OX1 3TA, United Kingdom.
- Department of Hospital Pharmacy, University of Toyama, Toyama 930-0194, Japan;

## SUPPORTING INFORMATION

|                                                                                                                                                                                                                                                                                                                                                                                                                                                       |         |
|-------------------------------------------------------------------------------------------------------------------------------------------------------------------------------------------------------------------------------------------------------------------------------------------------------------------------------------------------------------------------------------------------------------------------------------------------------|---------|
| <sup>1</sup> H NMR and <sup>13</sup> C NMR spectra for compounds <b>21<math>\alpha</math></b> , <b>21<math>\beta</math></b> , <b>10<math>\alpha</math></b> , <b>10<math>\beta</math></b> , <b>23</b> , <b>14.HCl</b> , <b>24</b> , <b>15.HCl</b> , <b>11<math>\alpha</math></b> , <b>11<math>\beta</math></b> , <b>27</b> , <b>28</b> , <b>32</b> , <b>18</b> , <b>13</b> , <b>39</b> , <b>41</b> , <b>17</b> , <b>36</b> , <b>37</b> , <b>38.HCl</b> | S2-S22  |
| Glycosidase inhibition studies of compound <b>38</b>                                                                                                                                                                                                                                                                                                                                                                                                  | S23-S24 |
| X-Ray cristal structure for compound <b>32</b>                                                                                                                                                                                                                                                                                                                                                                                                        | S25-S26 |

(1*R*,3*S*,4*S*,7*R*)-5-Benzyl-7-(benzyloxy)-3-methoxy-2-oxa-5-azabicyclo[2.2.1]heptane (21 $\alpha$ )

<sup>1</sup>H-NMR

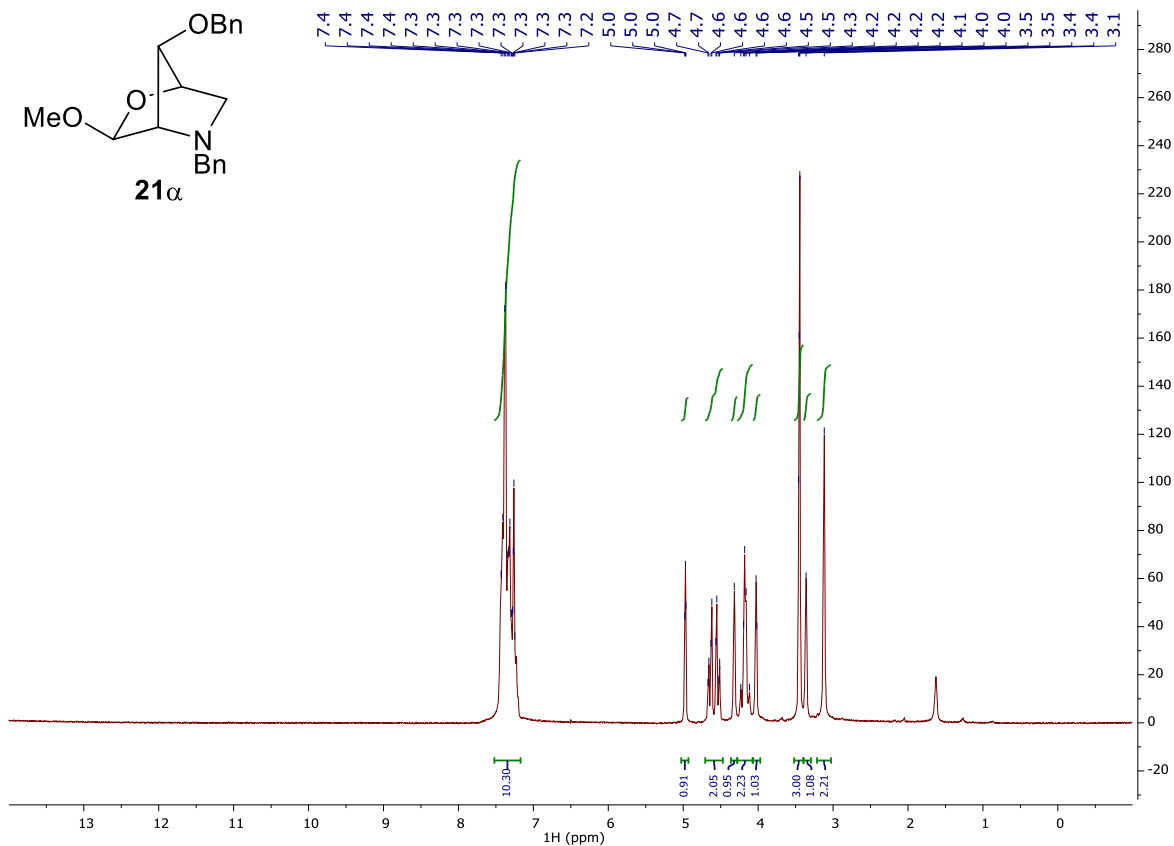

<sup>13</sup>C-NMR

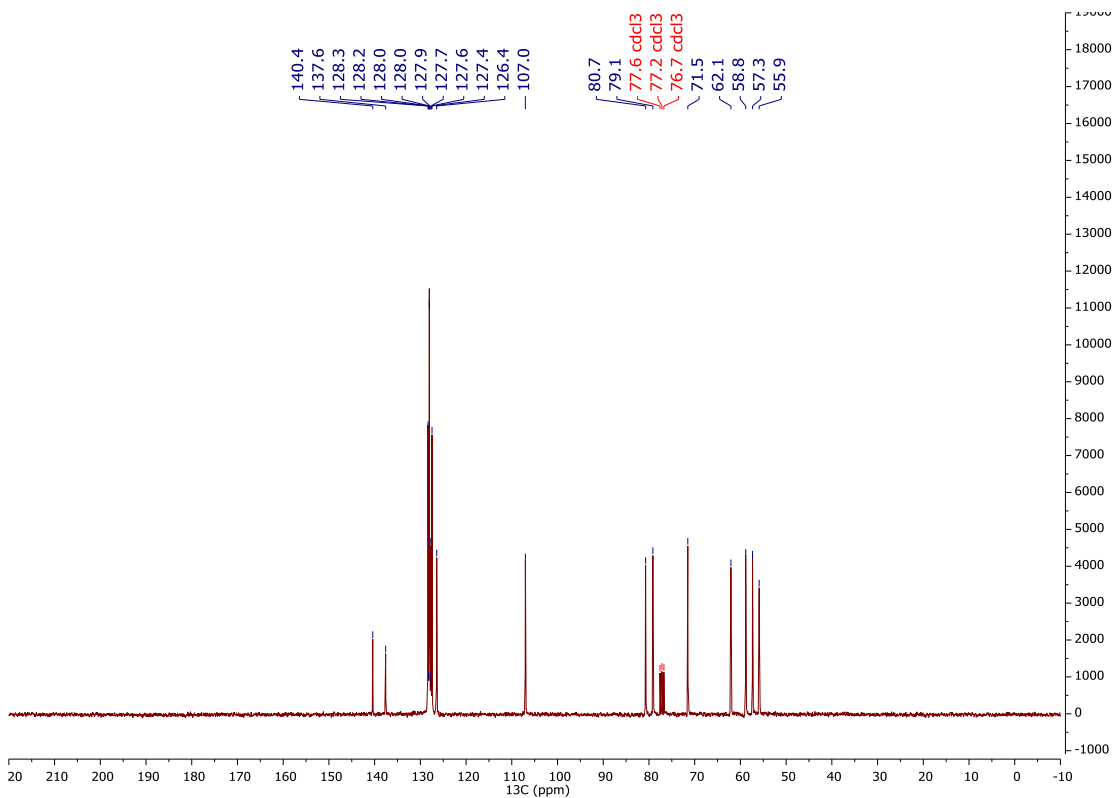

(1*R*,3*R*,4*S*,7*R*)-5-benzyl-7-(benzyloxy)-3-methoxy-2-oxa-5-azabicyclo[2.2.1]heptane (21β)

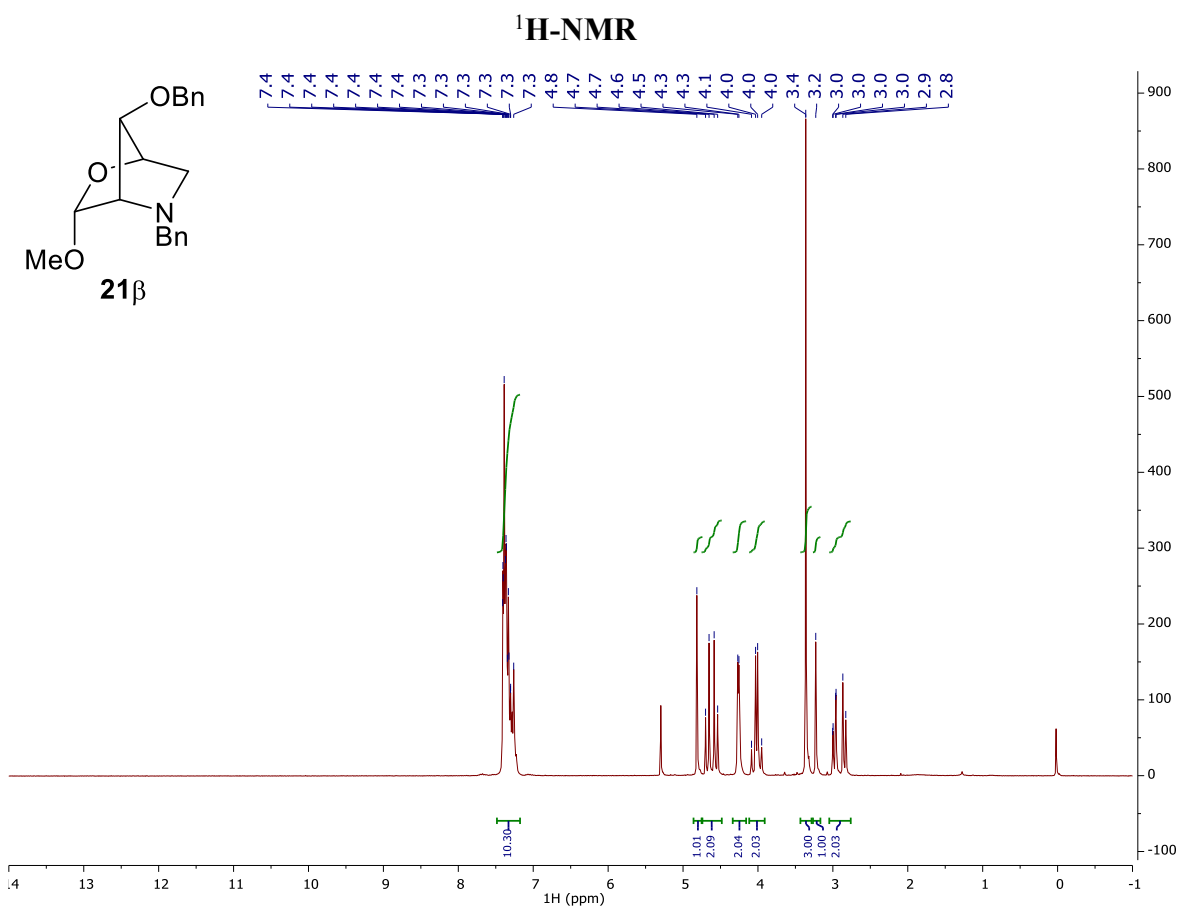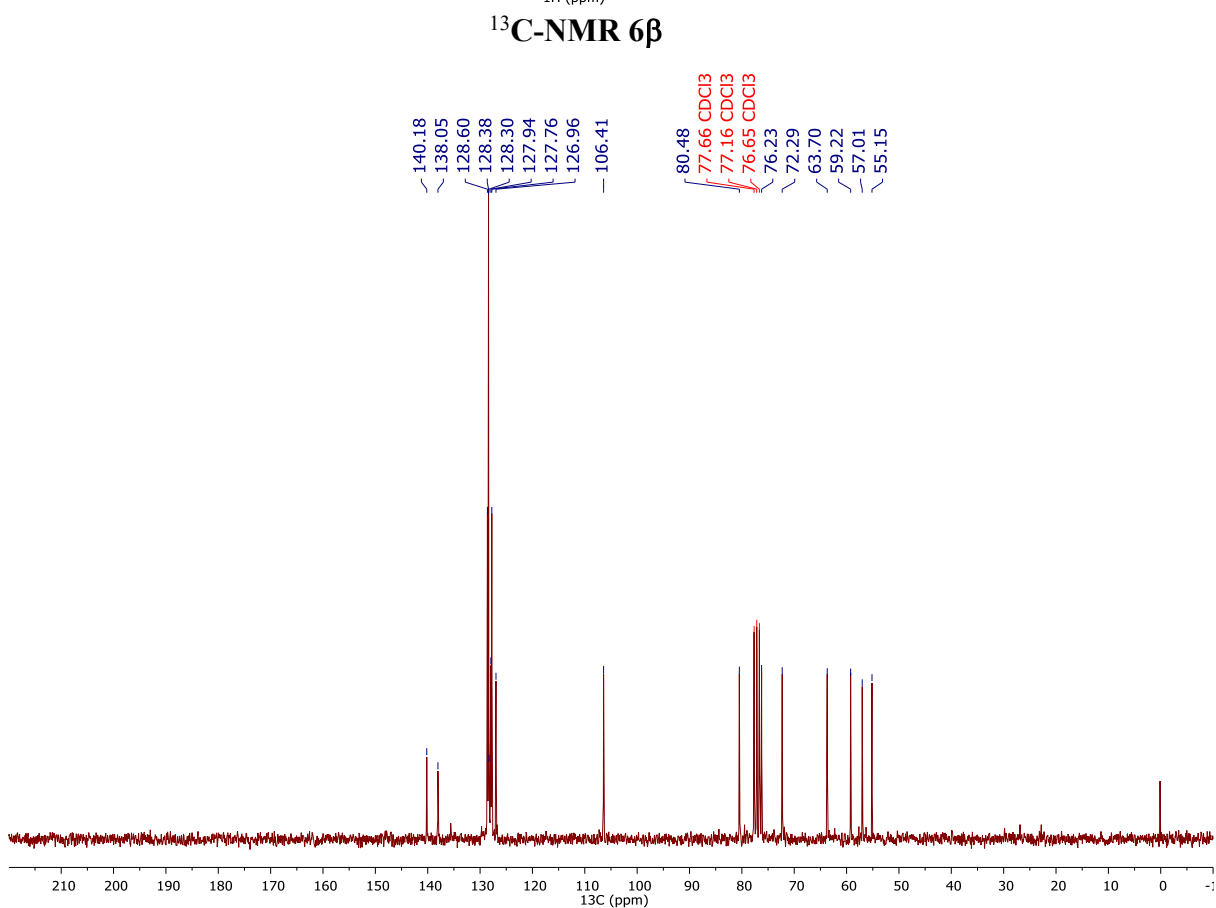

**Benzyl (1*R*,3*S*,4*S*,7*R*)-7-hydroxy-3-methoxy-2-oxa-5-azabicyclo[2.2.1]heptane-5-carboxylate (10 $\alpha$ )**

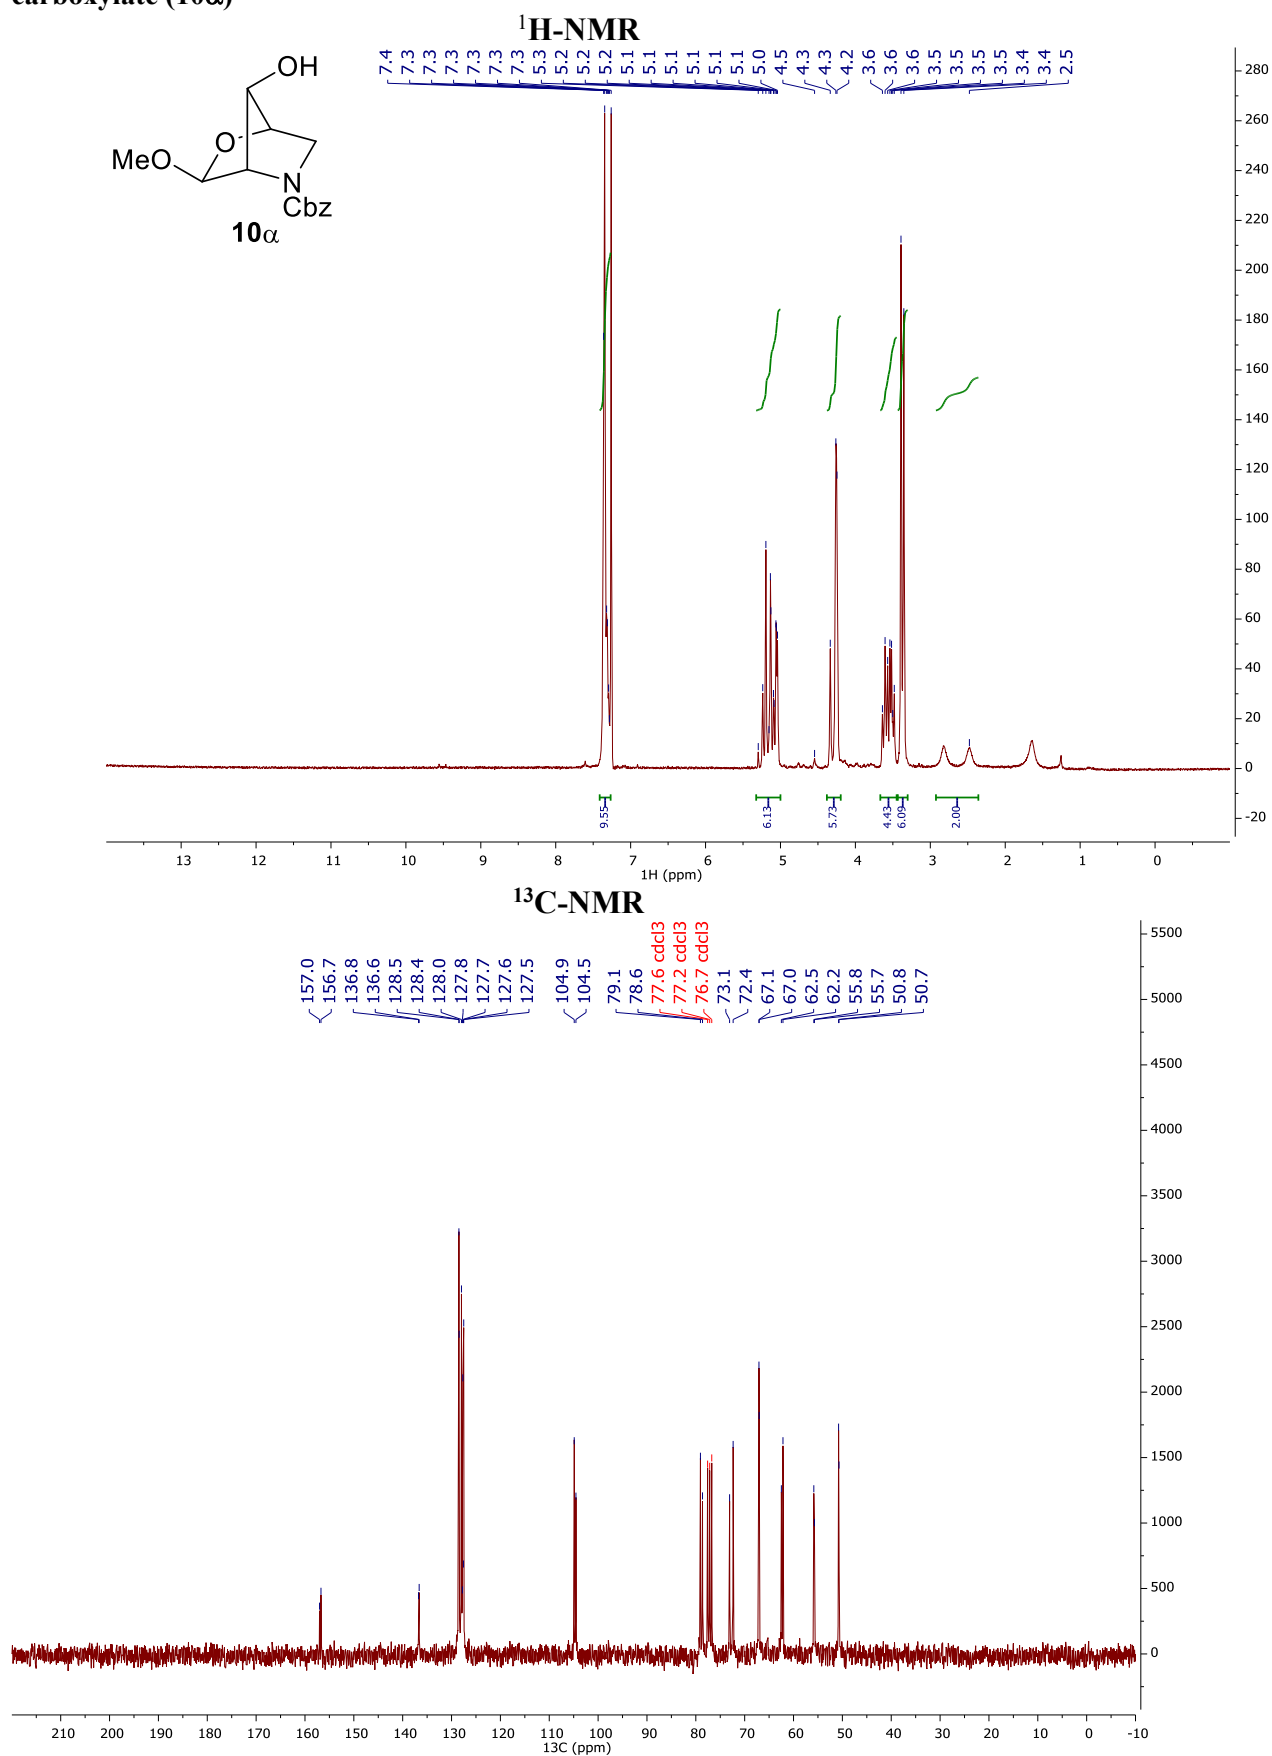

**Benzyl (1*R*,3*R*,4*S*,7*R*)-7-hydroxy-3-methoxy-2-oxa-5-azabicyclo[2.2.1]heptane-5-carboxylate (10 $\beta$ )**

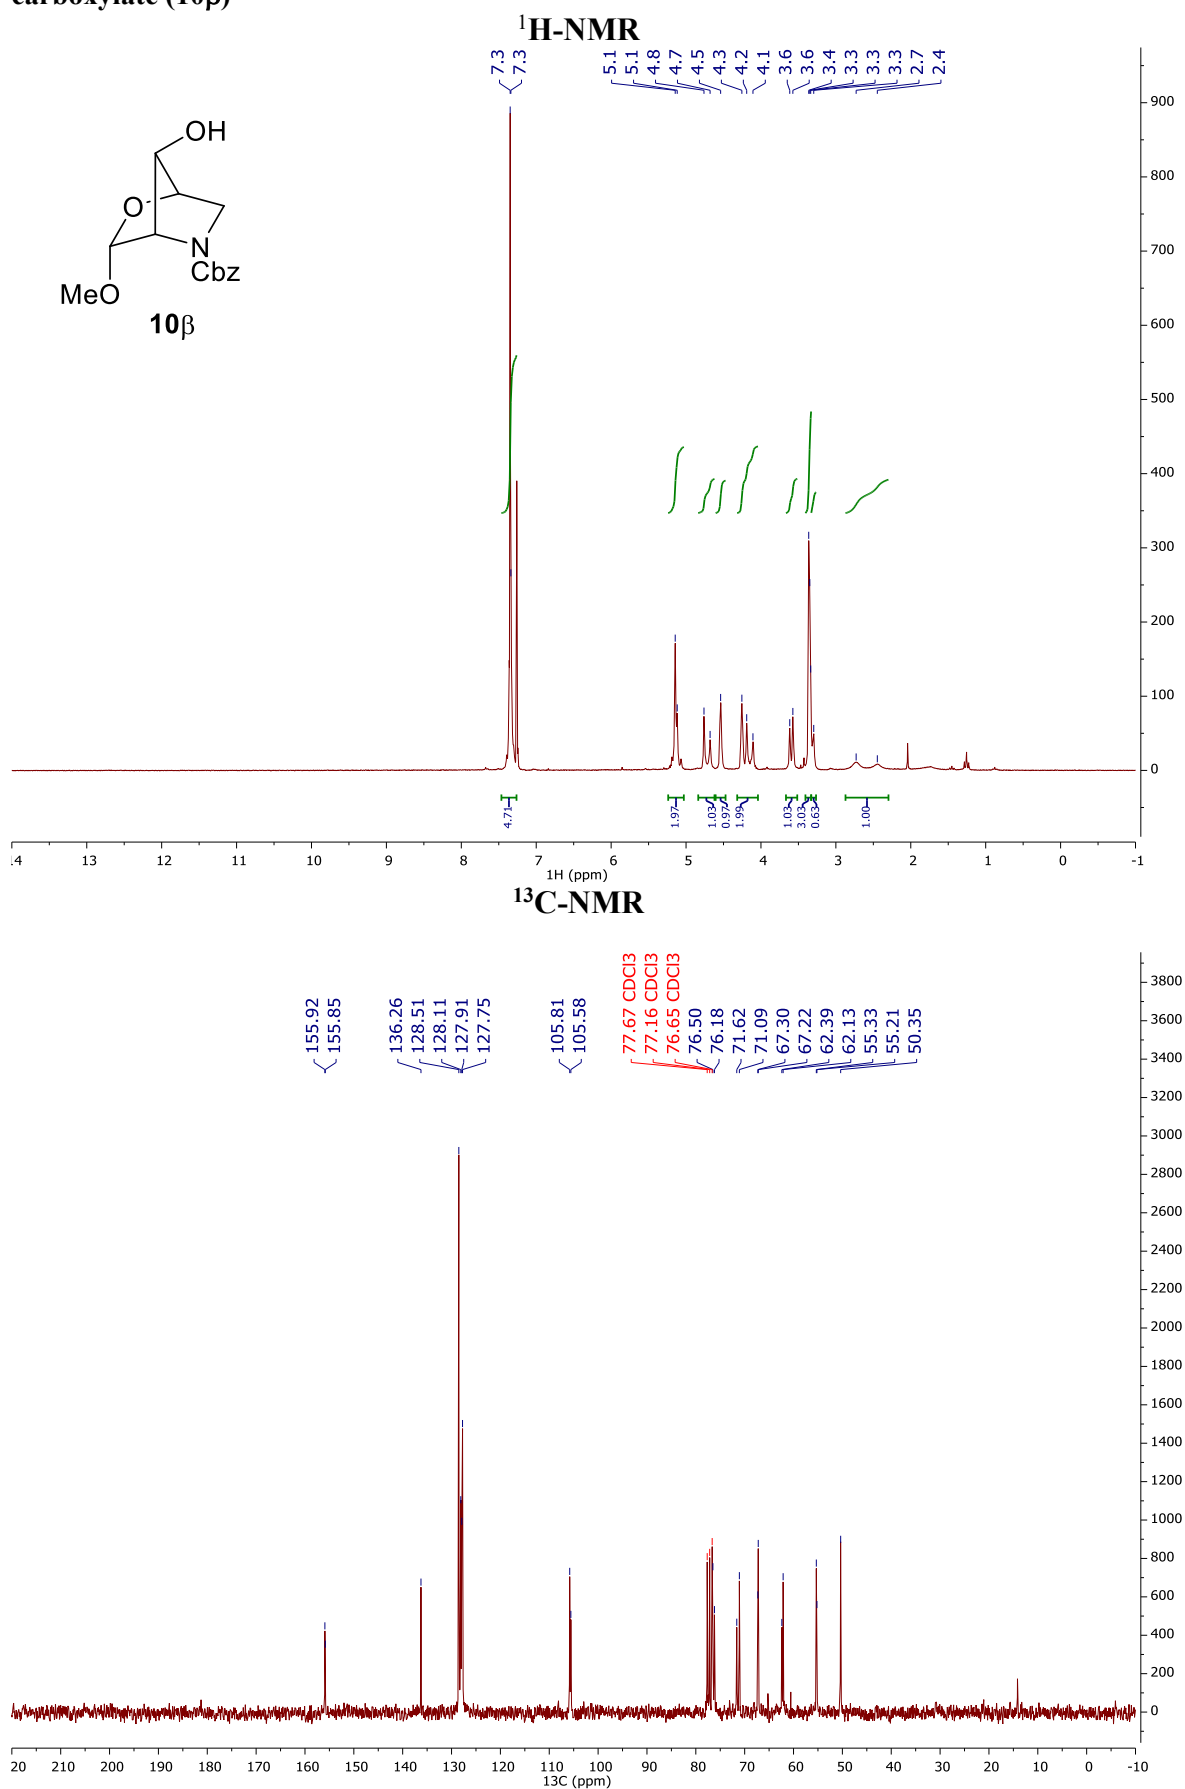

**Benzyl (2*R*,3*R*,4*R*)-3,4-dihydroxy-2-(hydroxymethyl)pyrrolidine-1-carboxylate (23)**

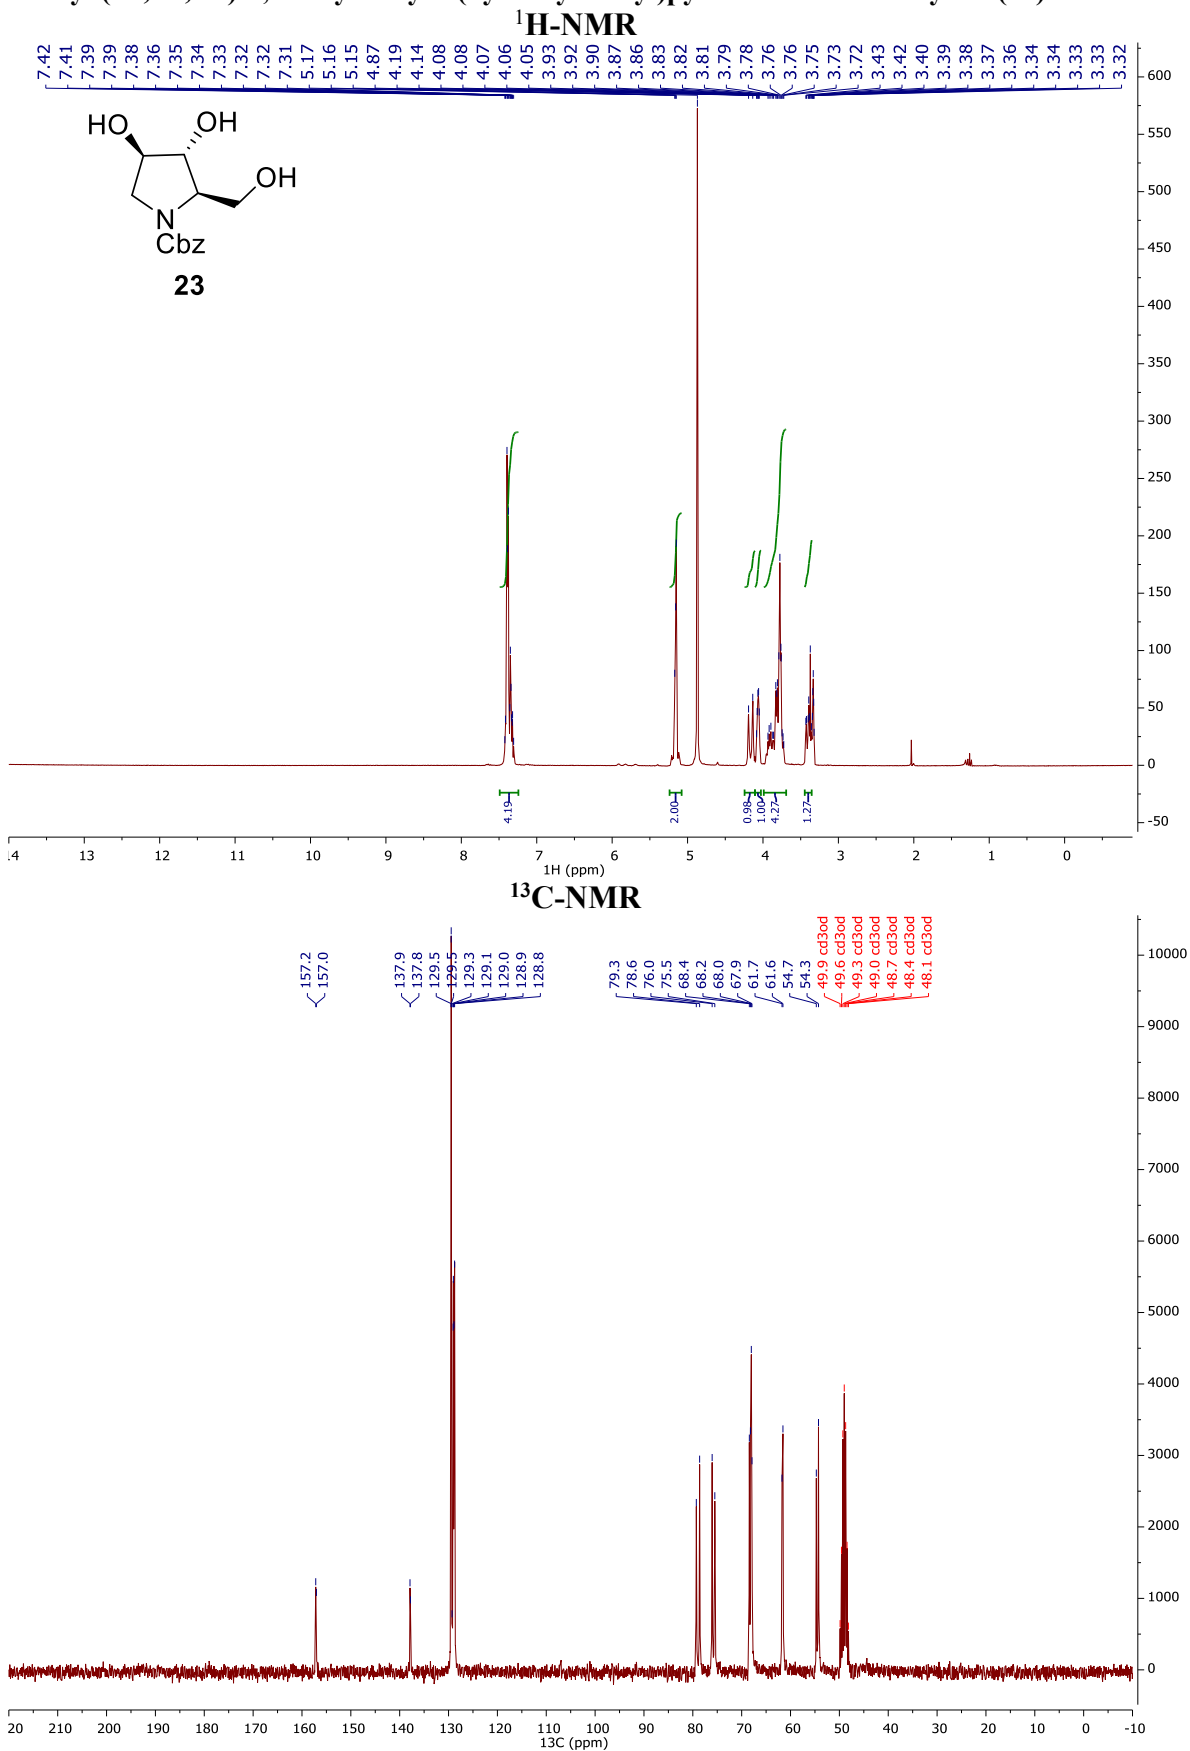

**(2R,3R,4R)-2-(Hydroxymethyl)pyrrolidine-3,4-diol (DAB) (14.HCl)**

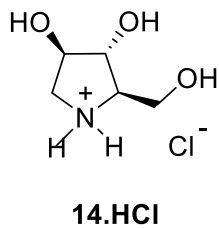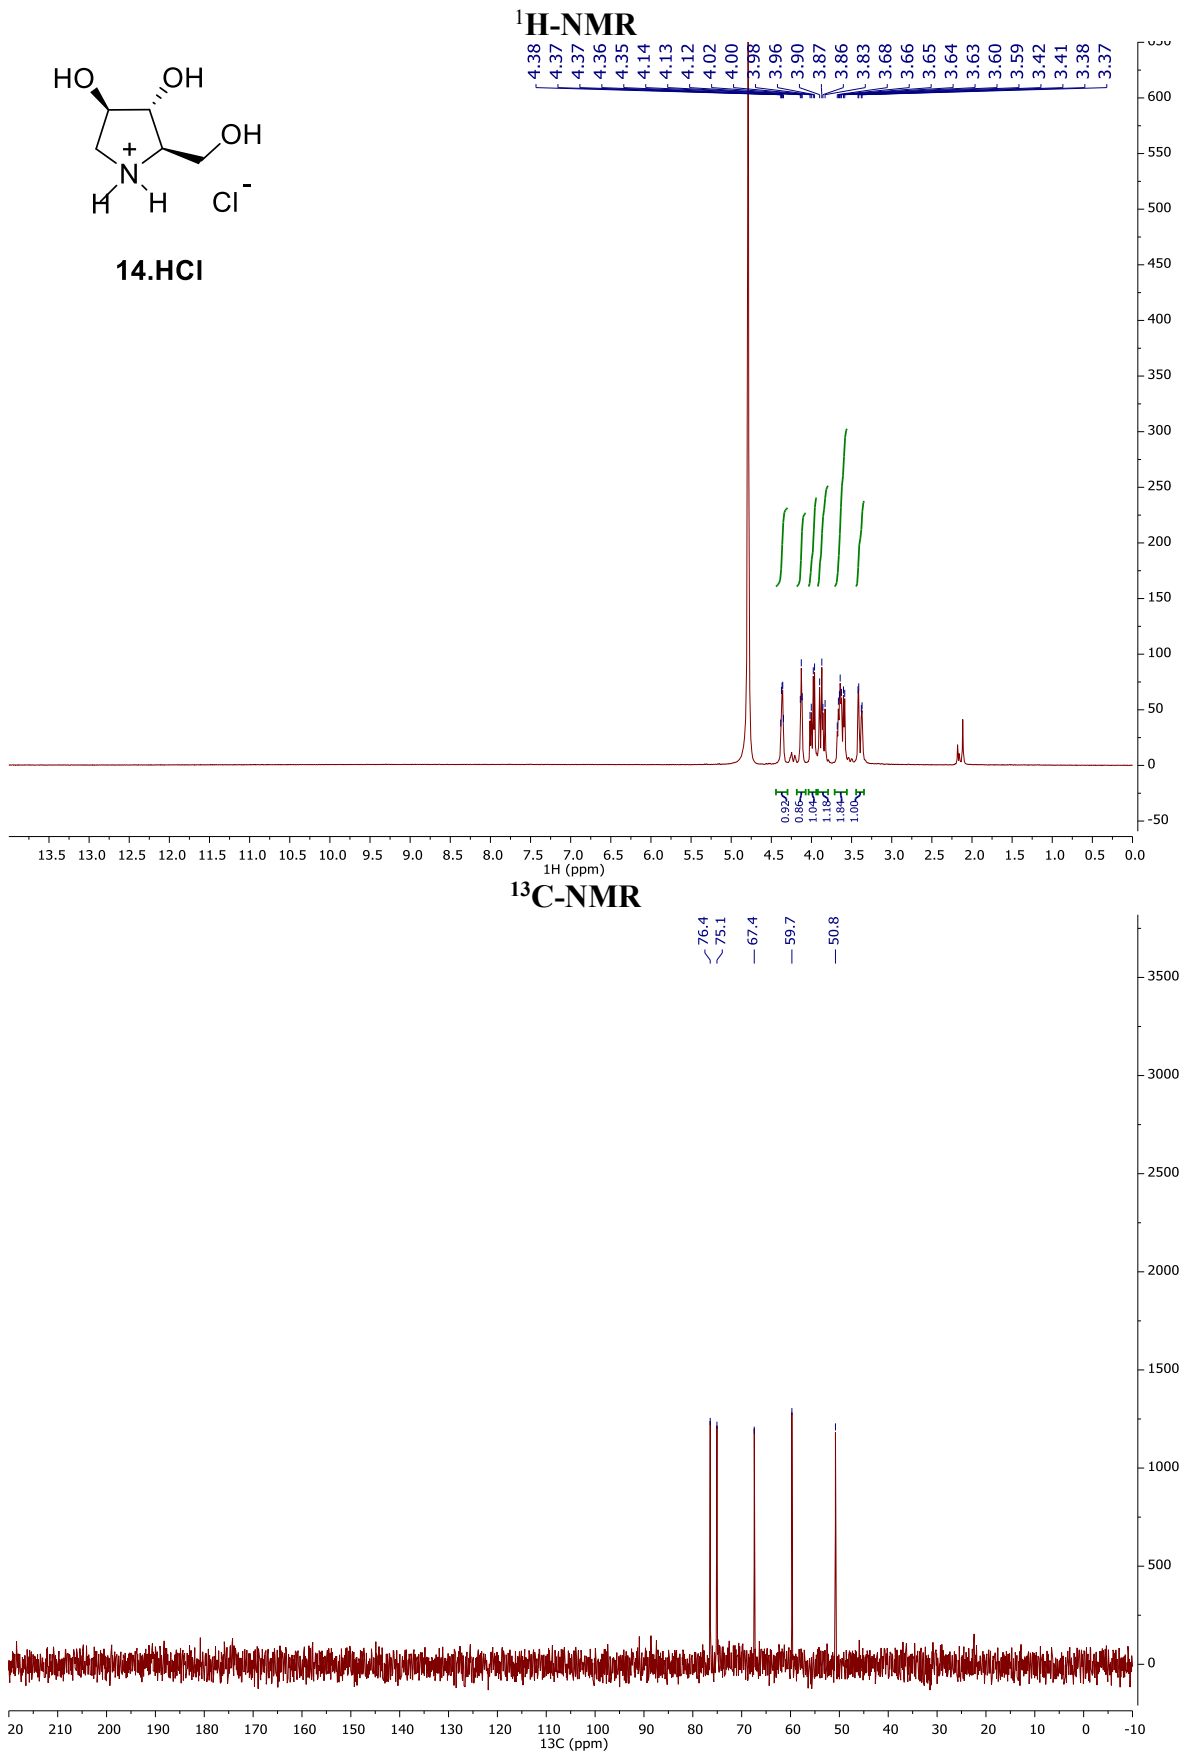

**(3*R*,4*R*)-*N*-((Benzyloxy)carbonyl)-3,4-dihydroxy-*L*-proline (24)**

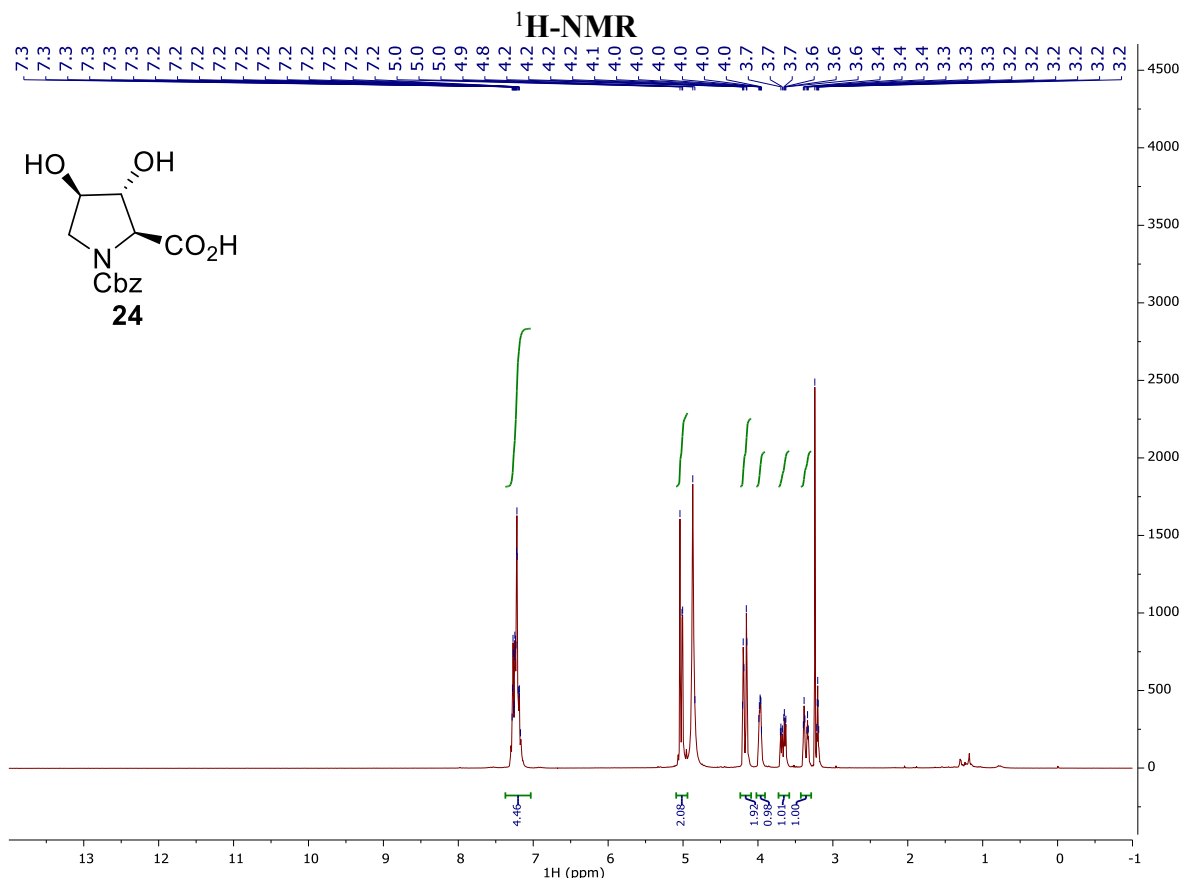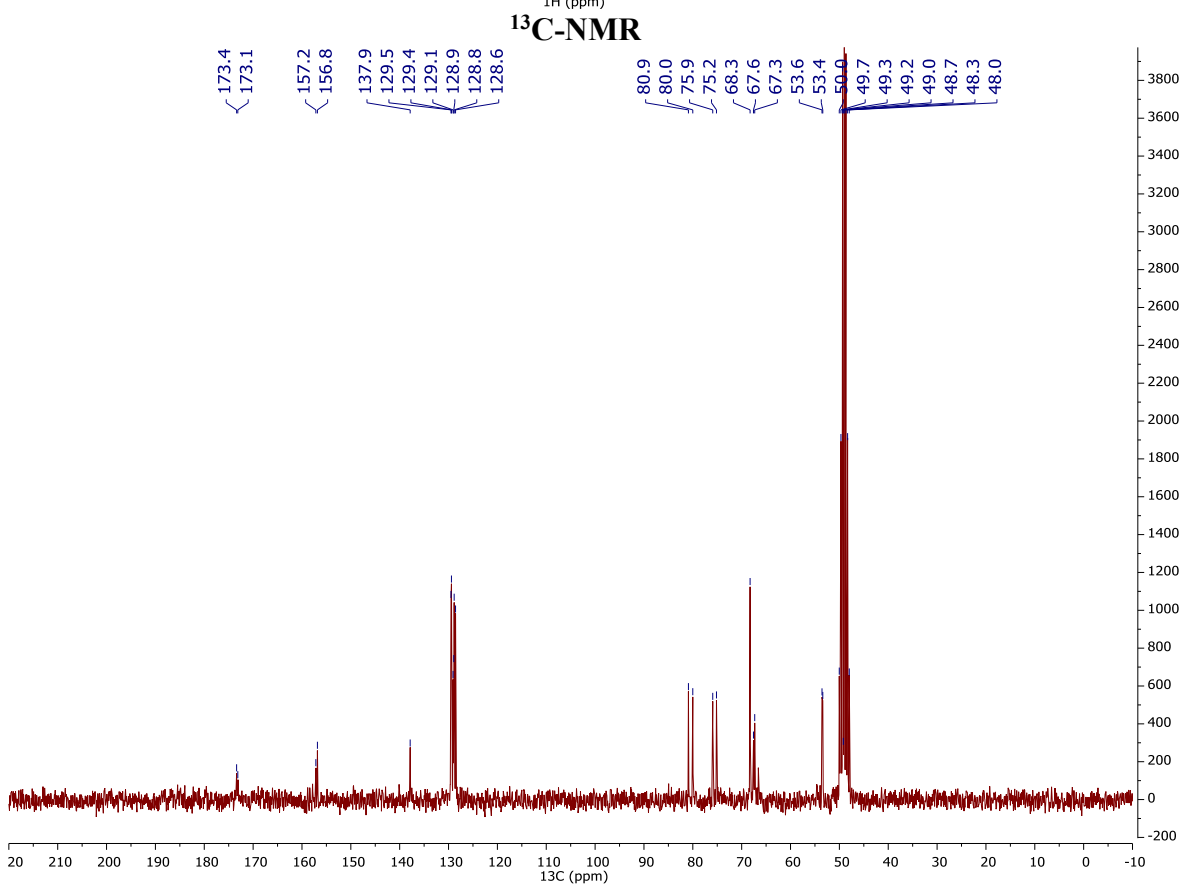



**(3*R*,4*R*)-3,4-Dihydroxy-*L*-proline (15.HCl)**

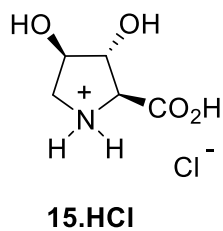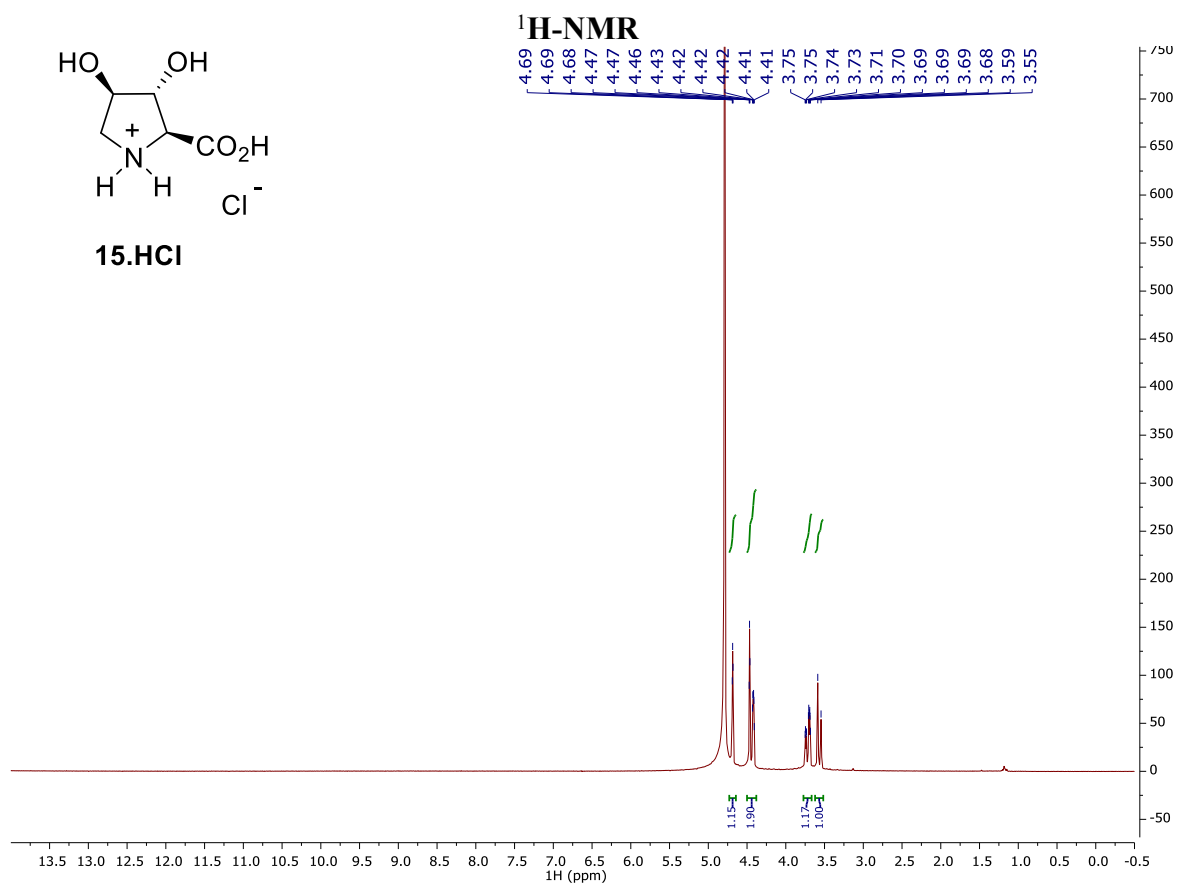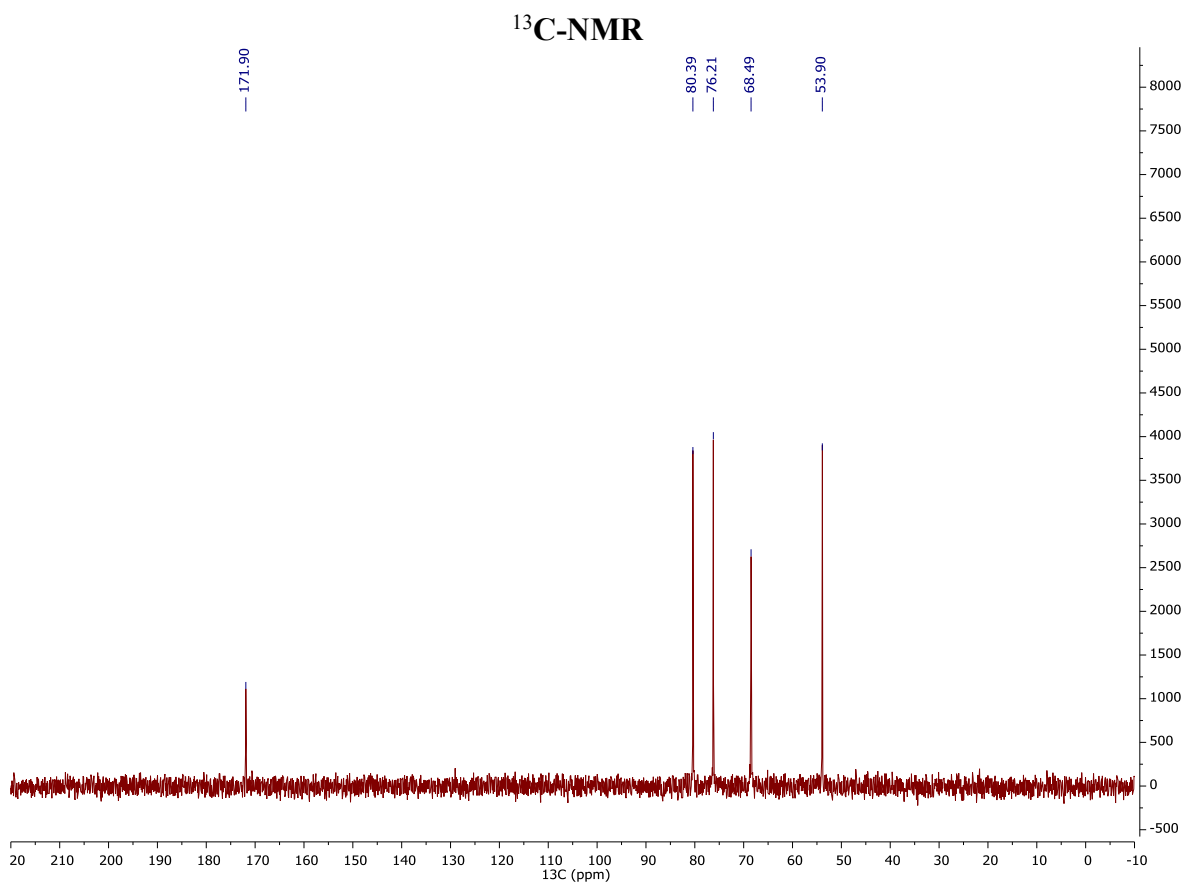

(1*R*,3*S*,4*S*,7*S*)-7-(Benzyloxy)-3-methoxy-2,5-dioxabicyclo[2.2.1]heptane (**11α**)

<sup>1</sup>H-NMR

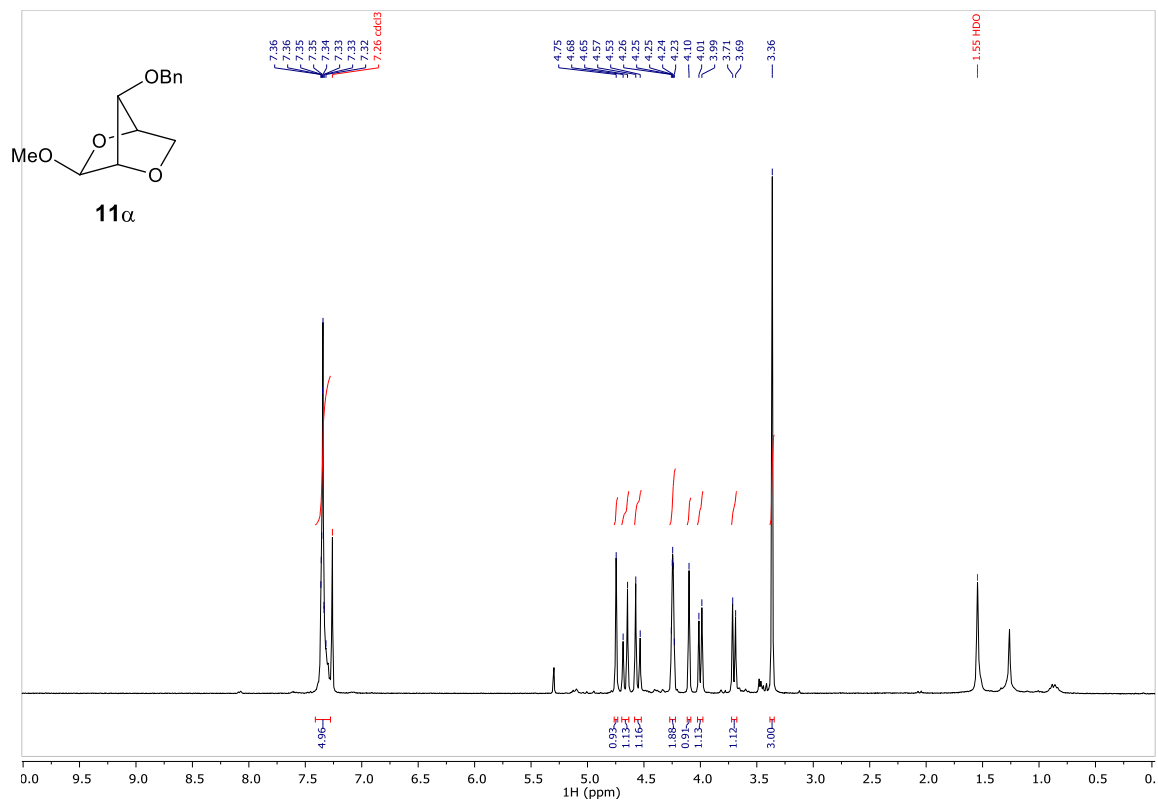

<sup>13</sup>C-NMR

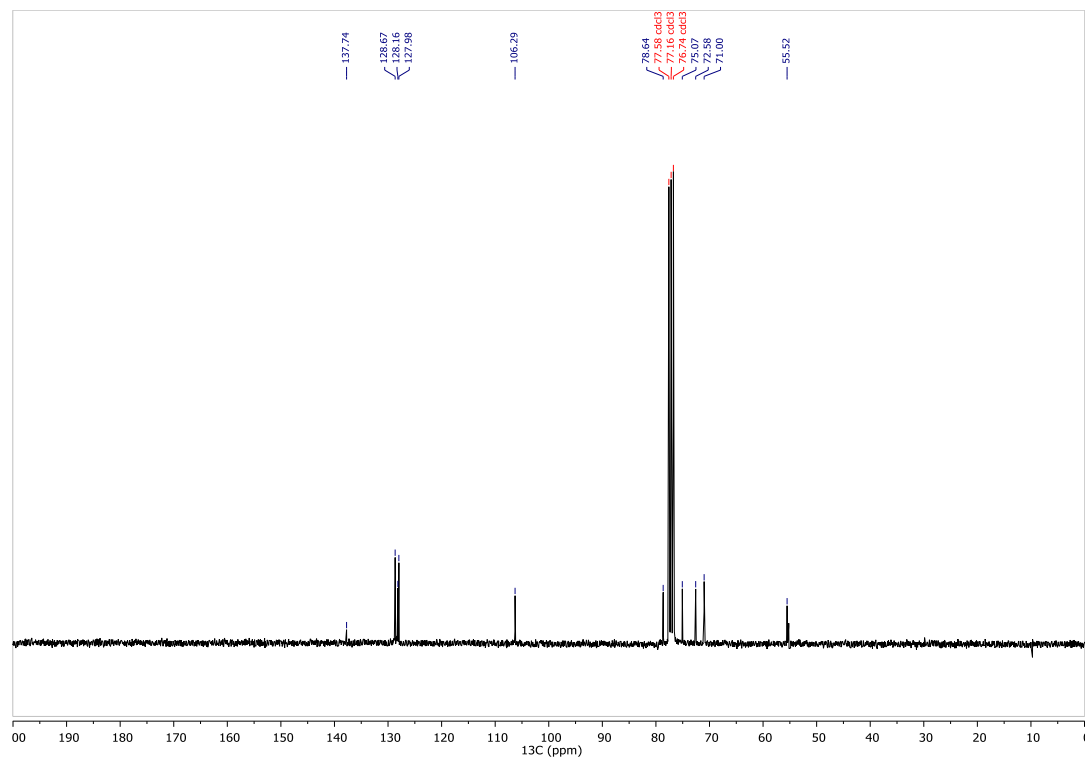

**(1*R*,3*S*,4*S*,7*S*)-7-(benzyloxy)-3-methoxy-2,5-dioxabicyclo[2.2.1]heptane (11 $\beta$ )**

**<sup>1</sup>H-NMR**

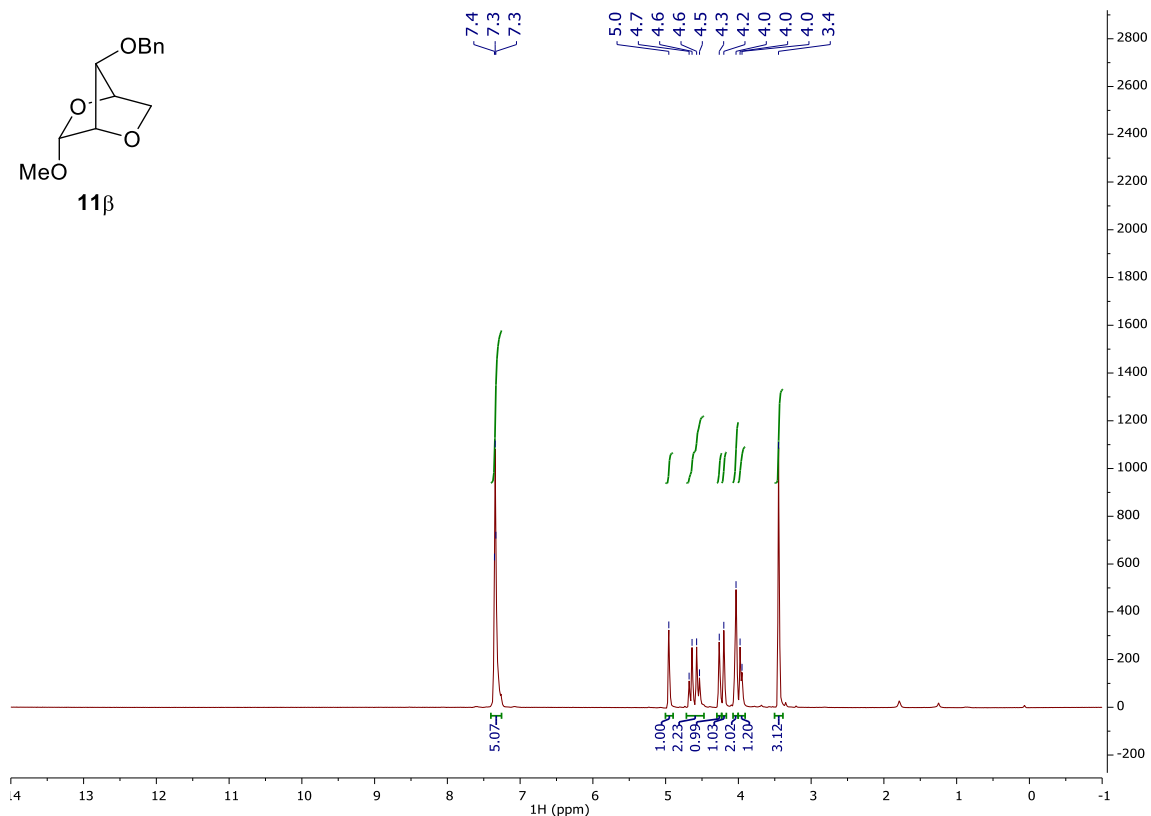

**<sup>13</sup>C-NMR**

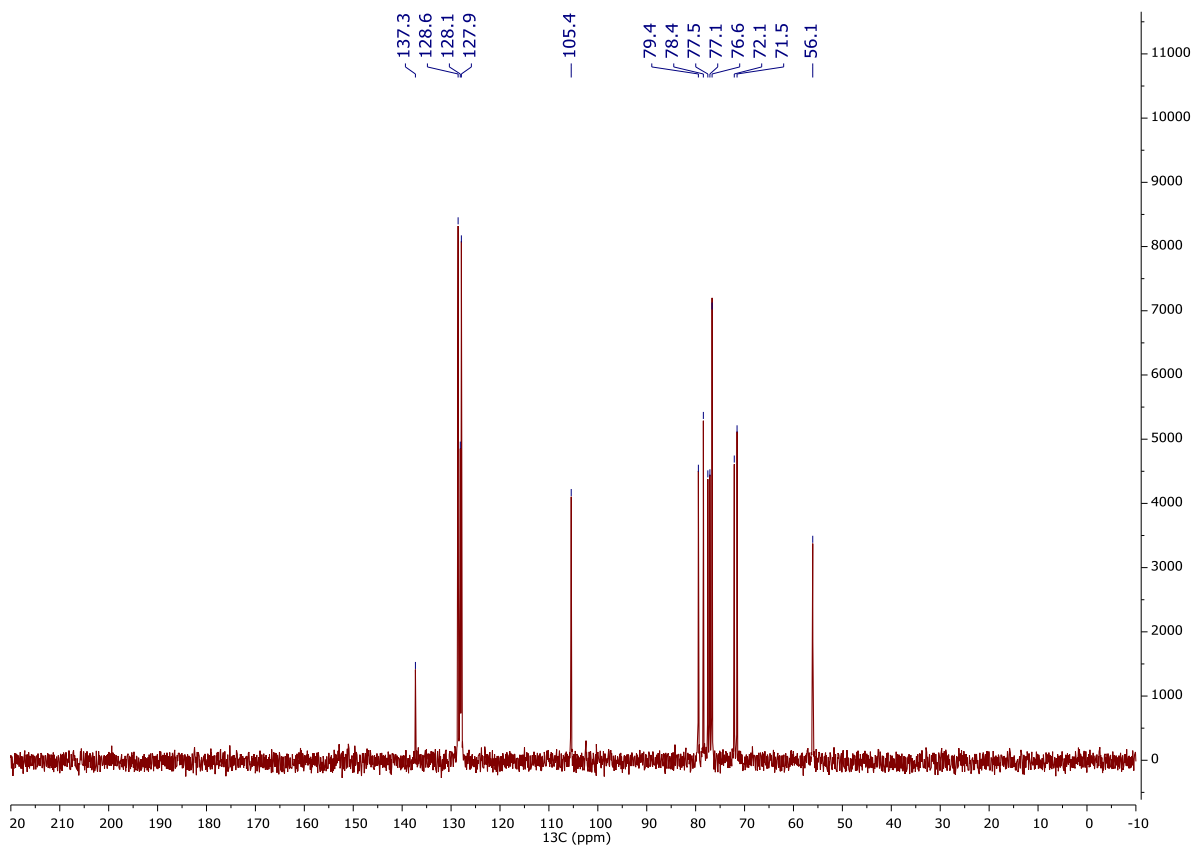

Methyl (2*S*,3*S*,4*R*)-3-(benzyloxy)-4-hydroxytetrahydrofuran-2-carboxylate (27)

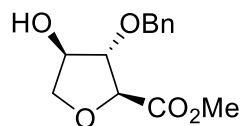

27

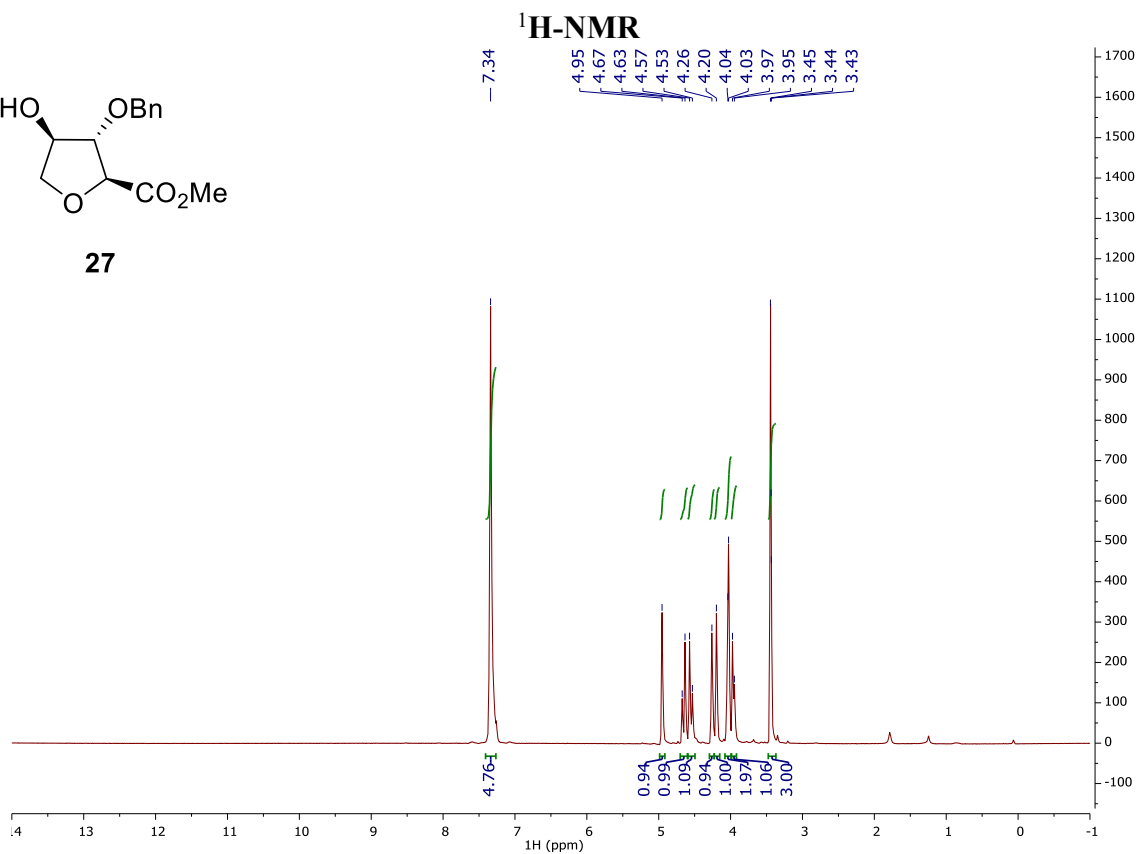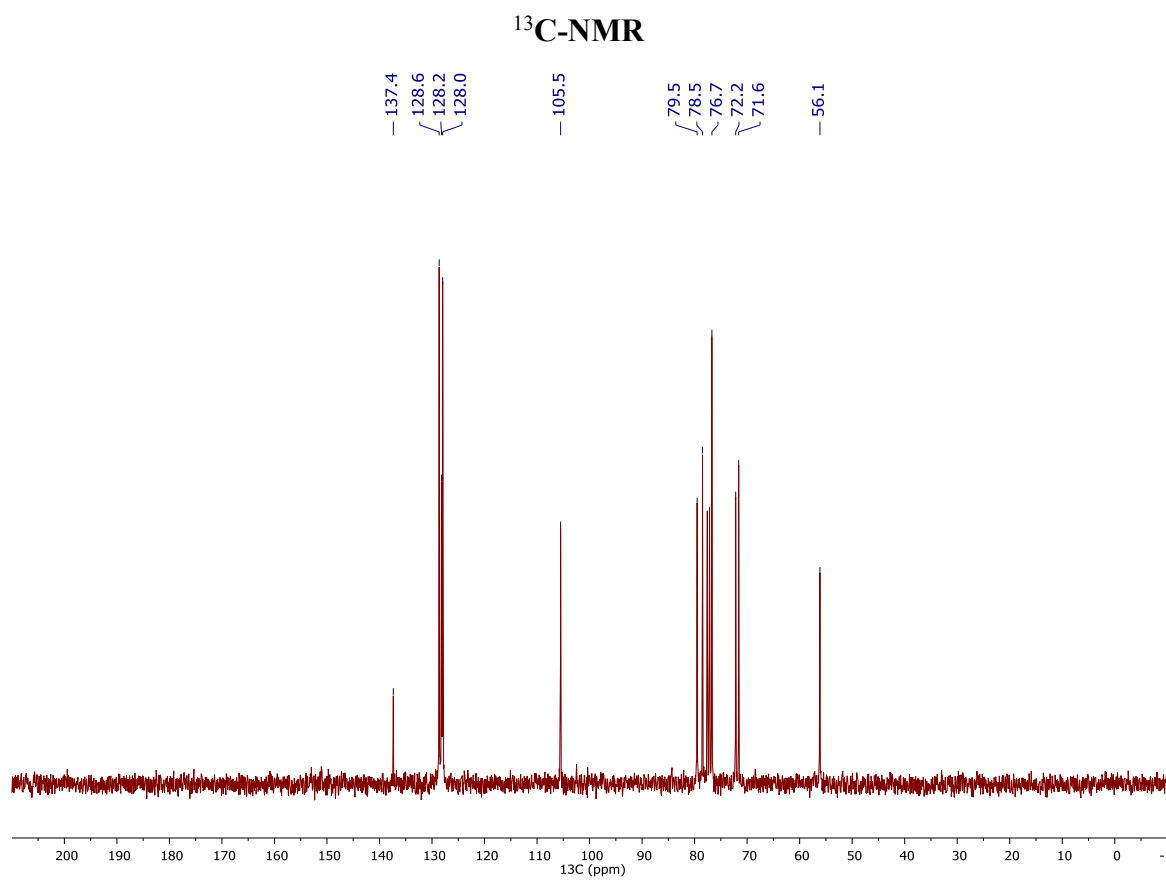

# Methyl (2*S*,3*S*,4*S*)-4-azido-3-(benzyloxy)tetrahydrofuran-2-carboxylate (28)

## <sup>1</sup>H-NMR

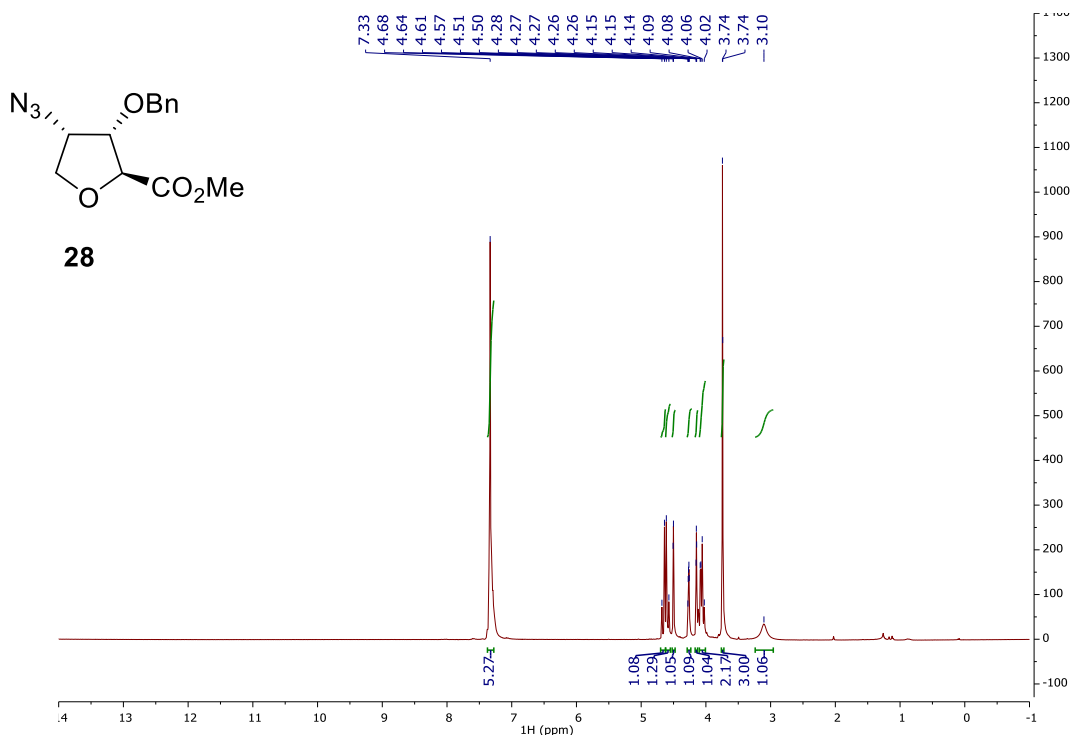

## <sup>13</sup>C-NMR

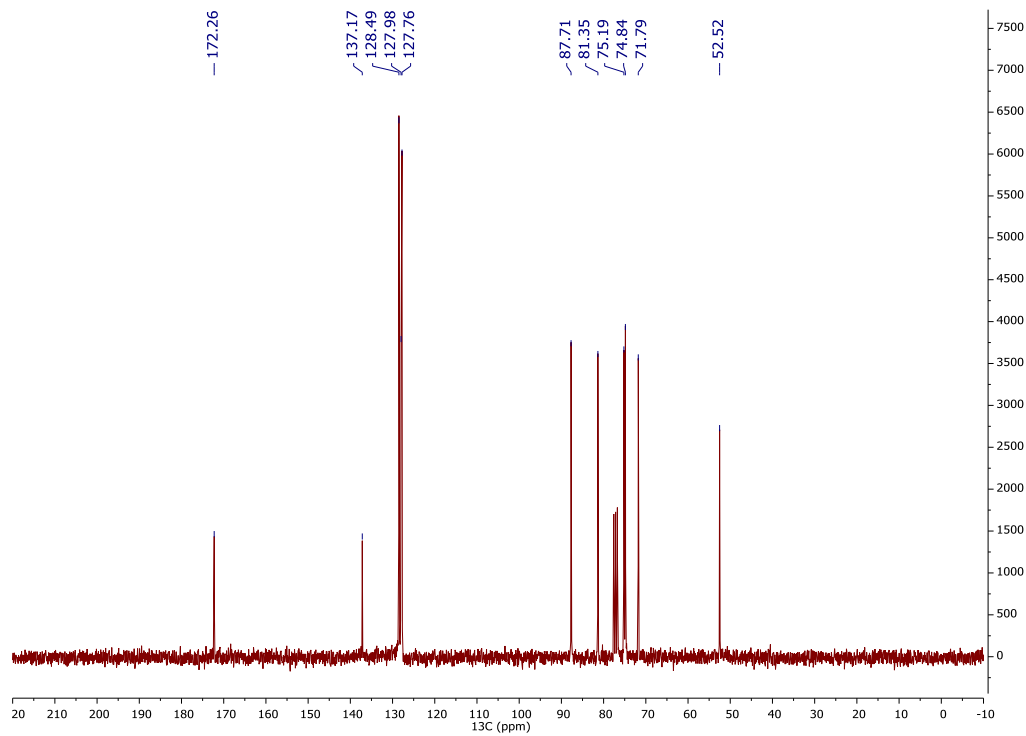

(Ethyl (1*R*,3*R*,4*S*,5*S*,7*R*)-7-(benzyloxy)-5-cyano-3-methoxy-2-oxabicyclo[2.2.1]heptane-5-carboxylate (32)

<sup>1</sup>H-NMR

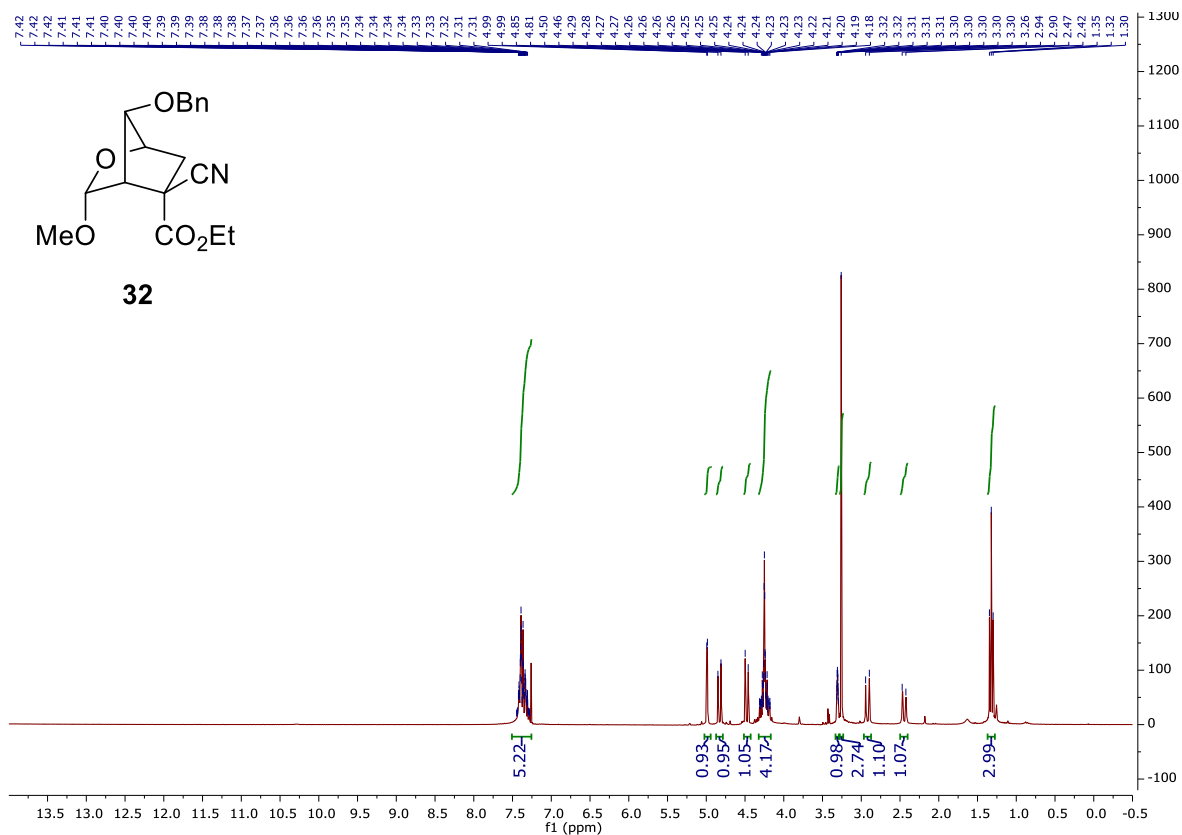

<sup>13</sup>C-NMR

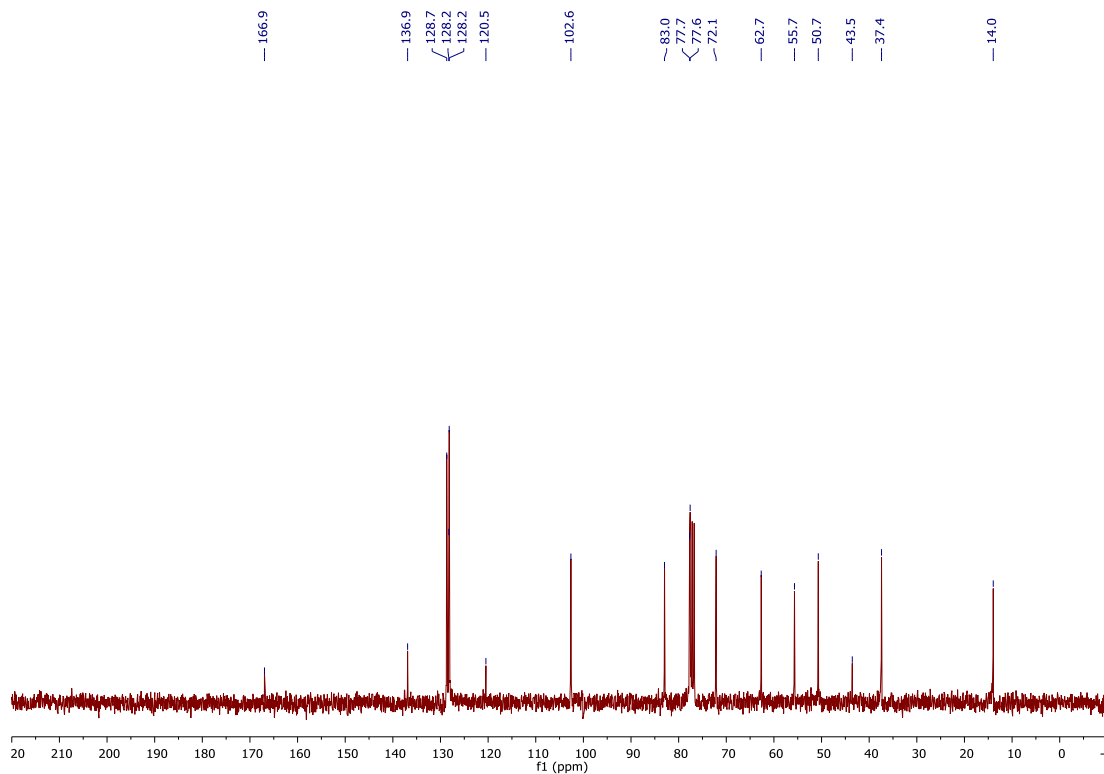

**Ethyl (1*R*,3*R*,4*S*,5*S*,7*R*)-7-(benzyloxy)-5-(((benzyloxy)carbonyl)amino)methyl)-3-methoxy-2-oxabicyclo[2.2.1]heptane-5-carboxylate (18)**

**<sup>1</sup>H-NMR**

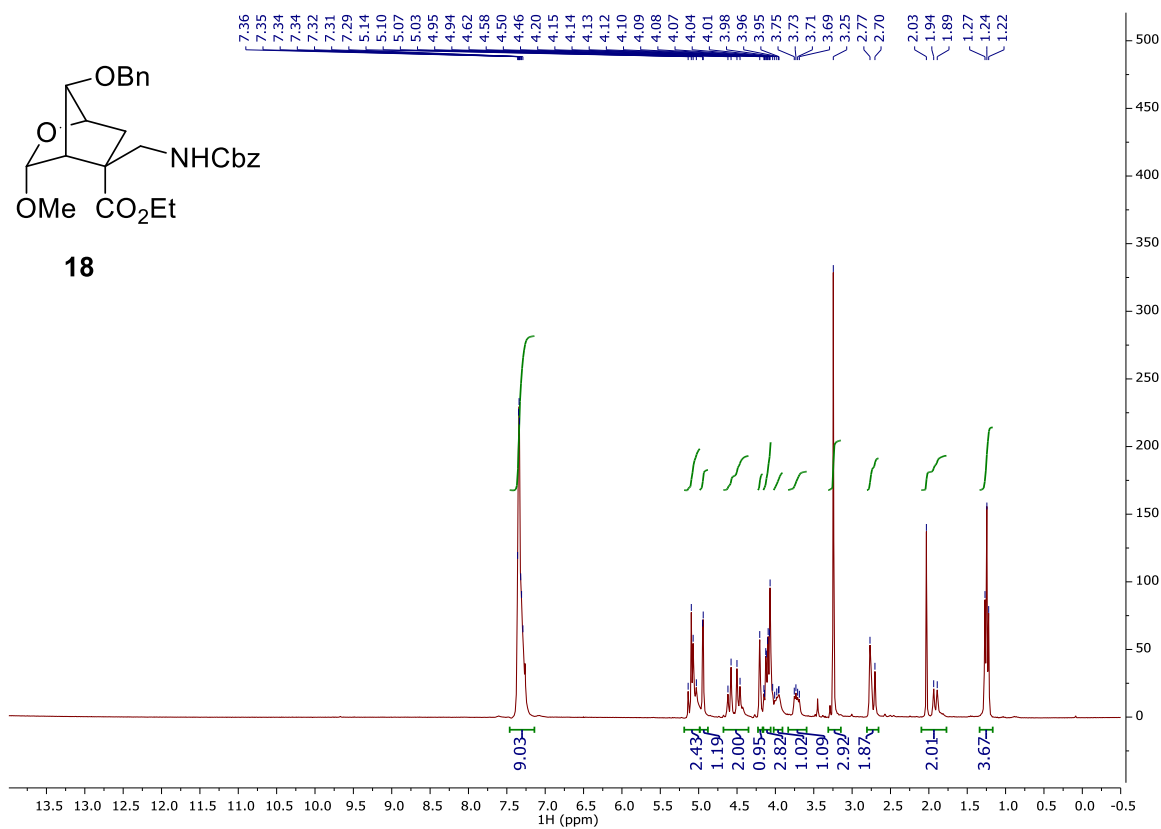

**<sup>13</sup>C-NMR**

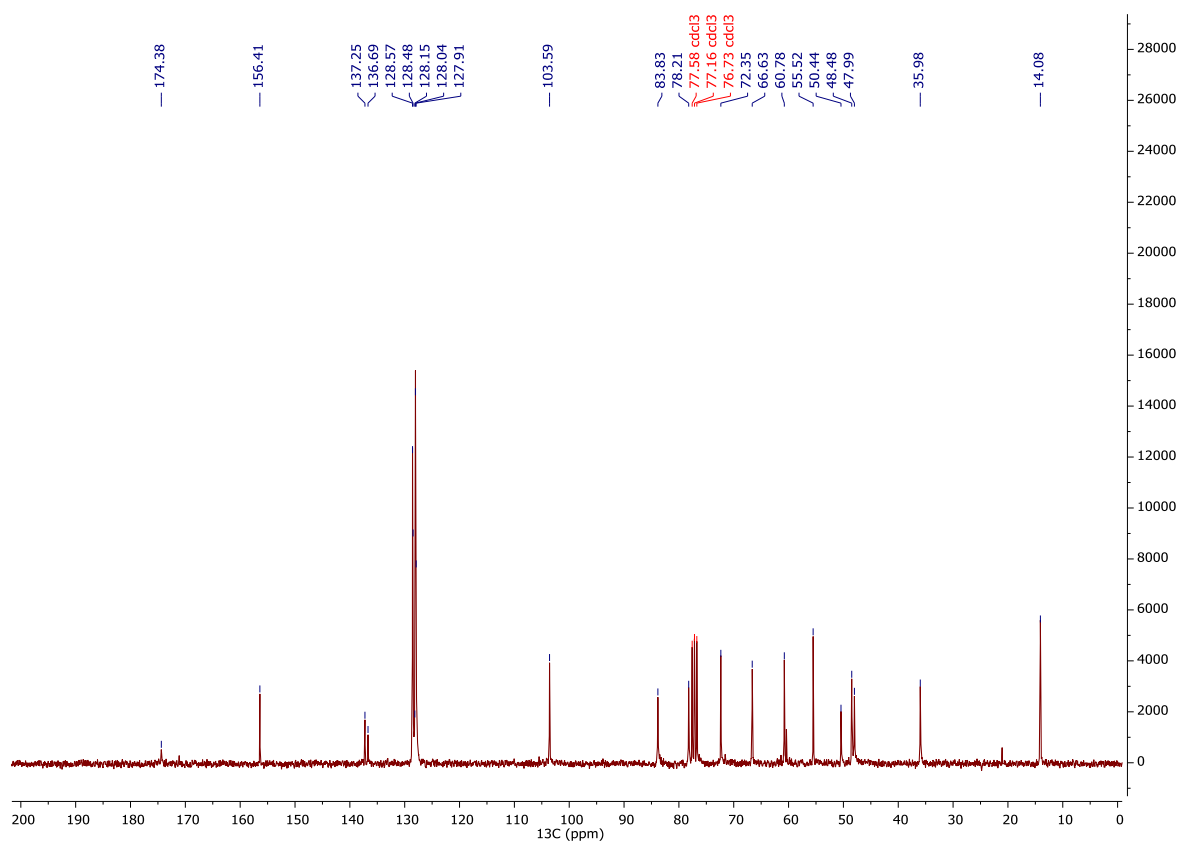

**Allyl (1*R*,3*R*,4*S*,5*S*,7*R*)-7-(benzyloxy)-5-cyano-3-methoxy-2-oxabicyclo[2.2.1]heptane-5-carboxylate (13)**

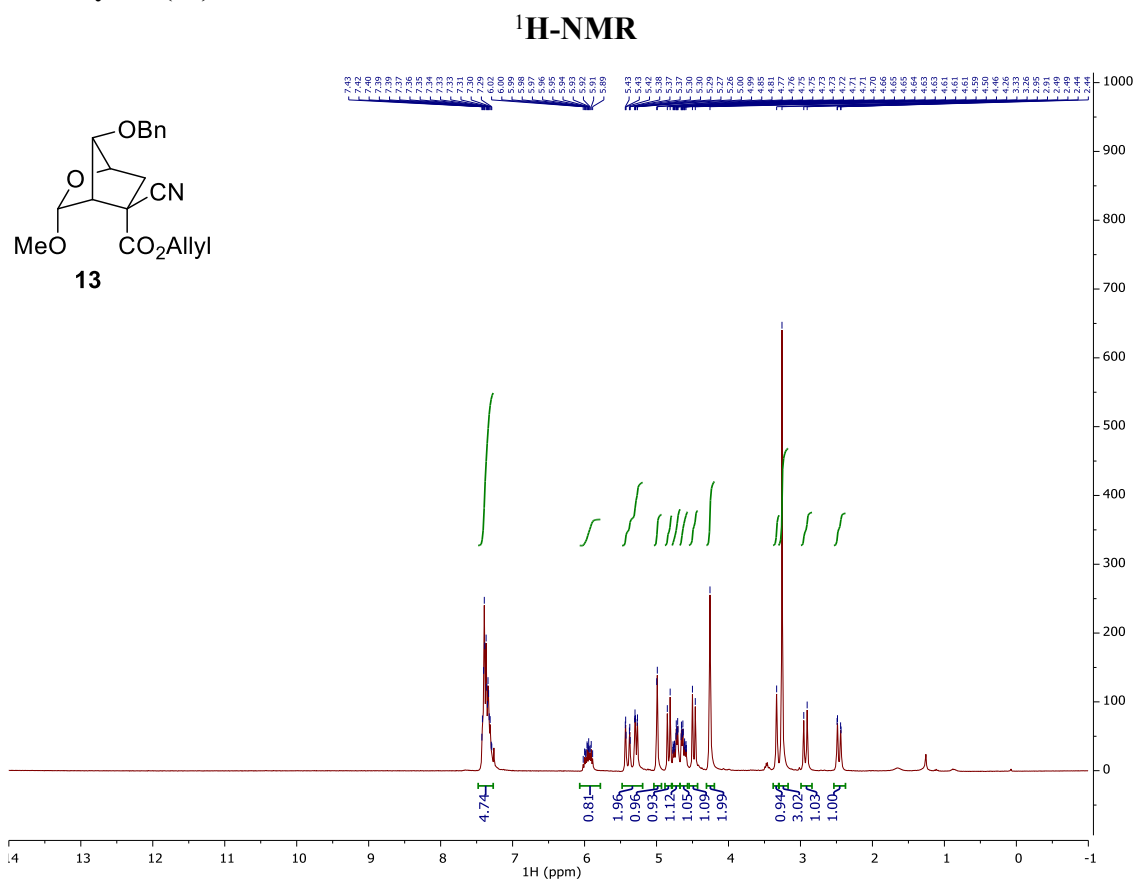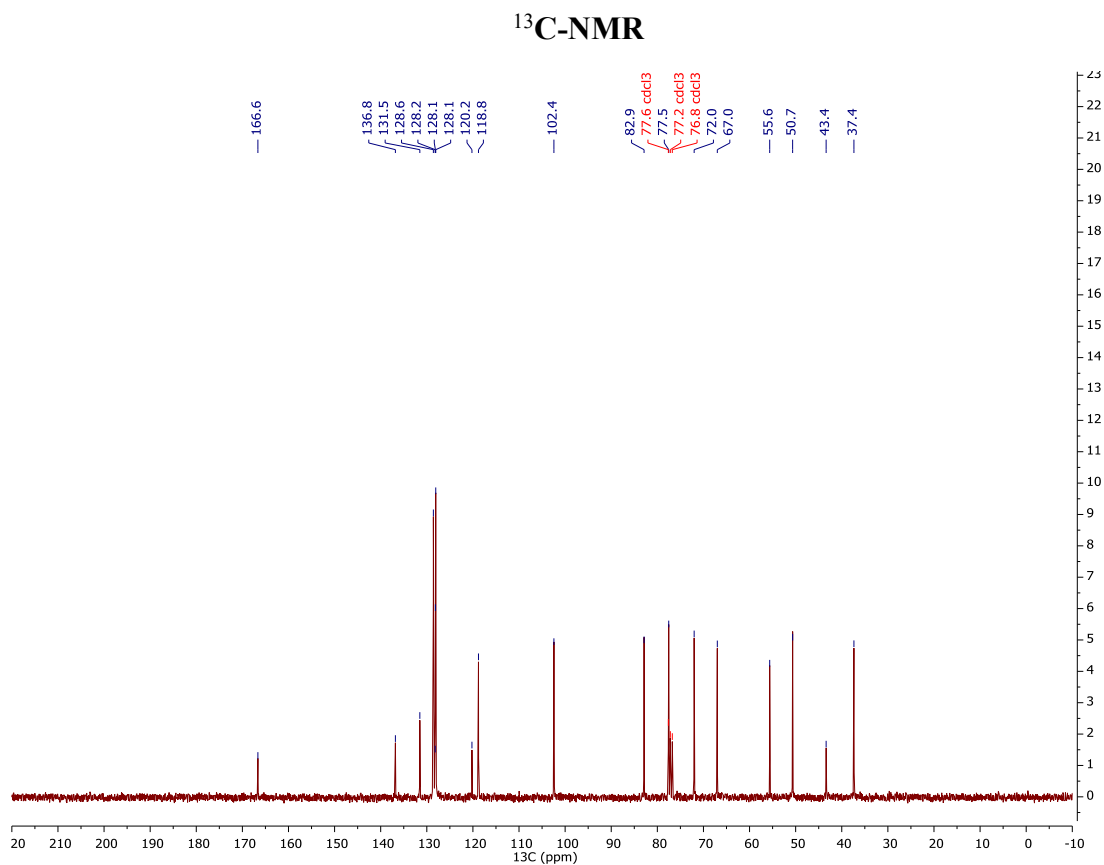



**Methyl ((1*R*,3*R*,4*S*,5*S*,7*R*)-7-(benzyloxy)-5-cyano-3-methoxy-2-oxabicyclo[2.2.1]heptane-5-carbonyl)glycinate (39)**

**<sup>1</sup>H-NMR**

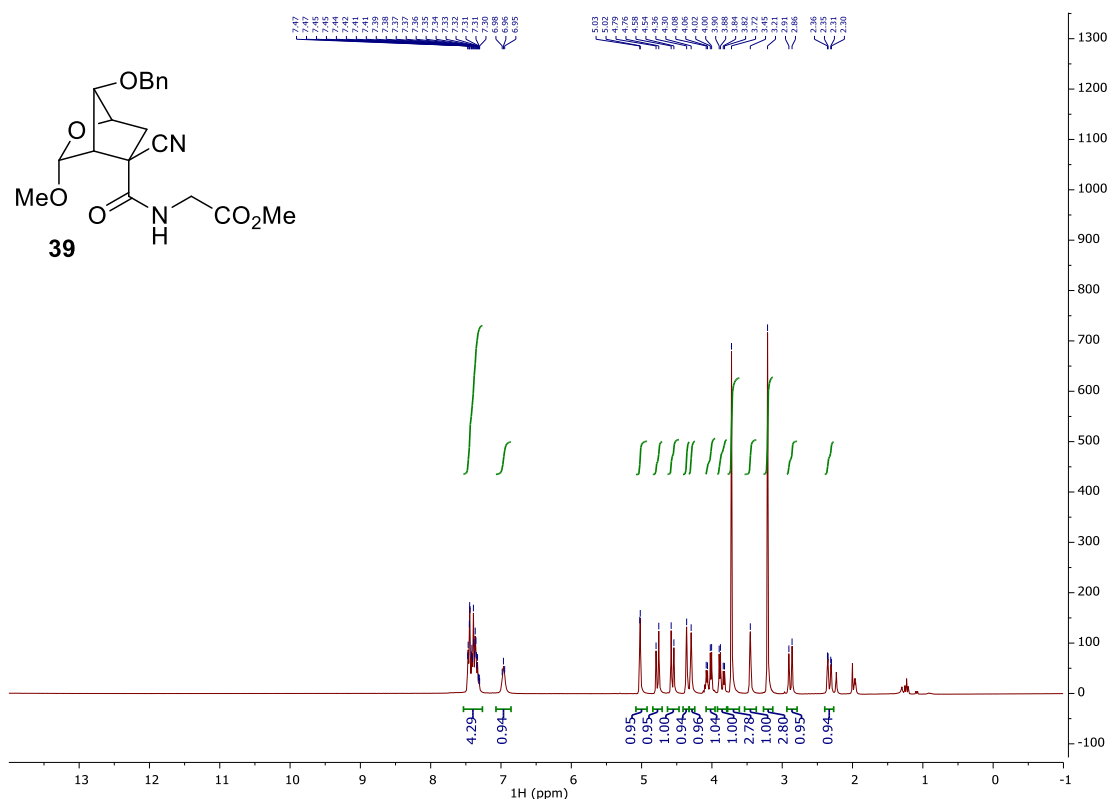

**<sup>13</sup>C-NMR**

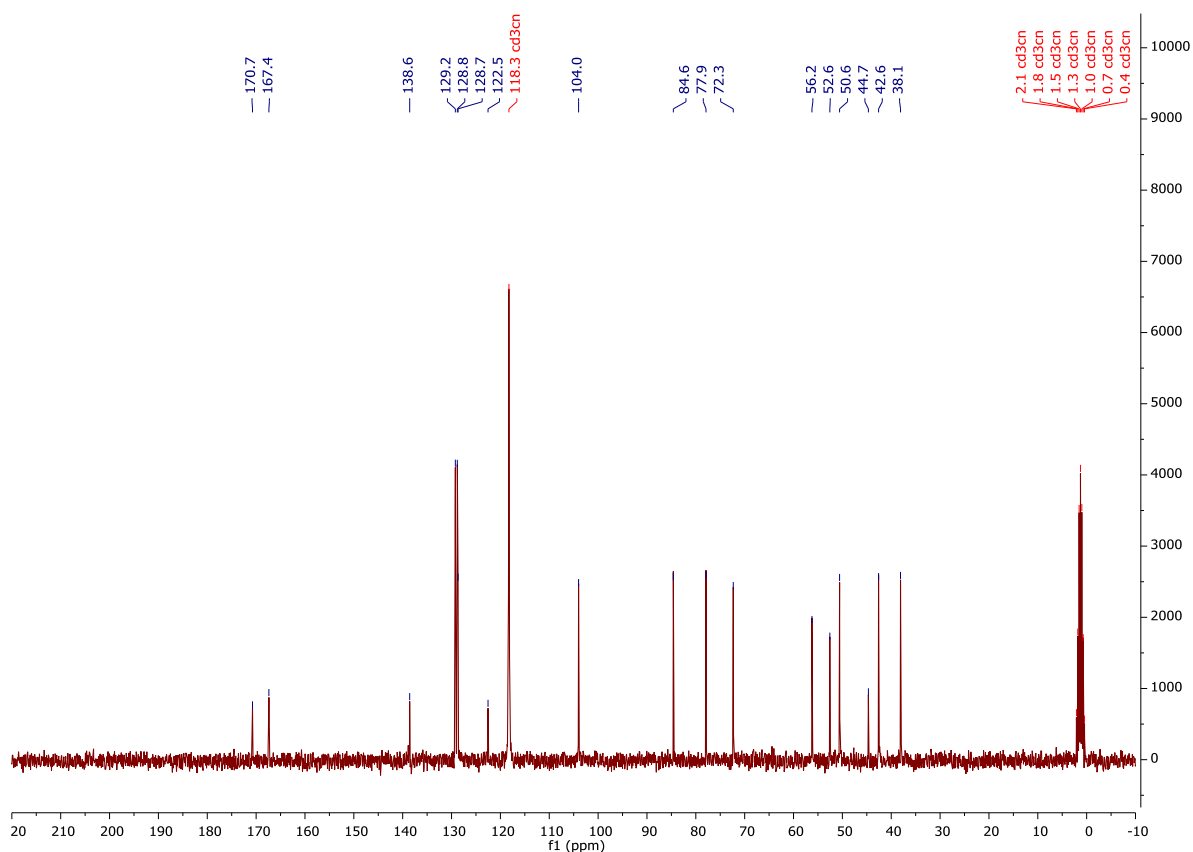



Methyl

((1*S*,2*R*,3*R*,4*R*)-3-(benzyloxy)-1-((2-

(((benzyloxy)carbonyl)amino)acetamido)methyl)-4-hydroxy-2-

(hydroxymethyl)cyclopentane-1-carbonyl)glycinate (17)

<sup>1</sup>H-NMR

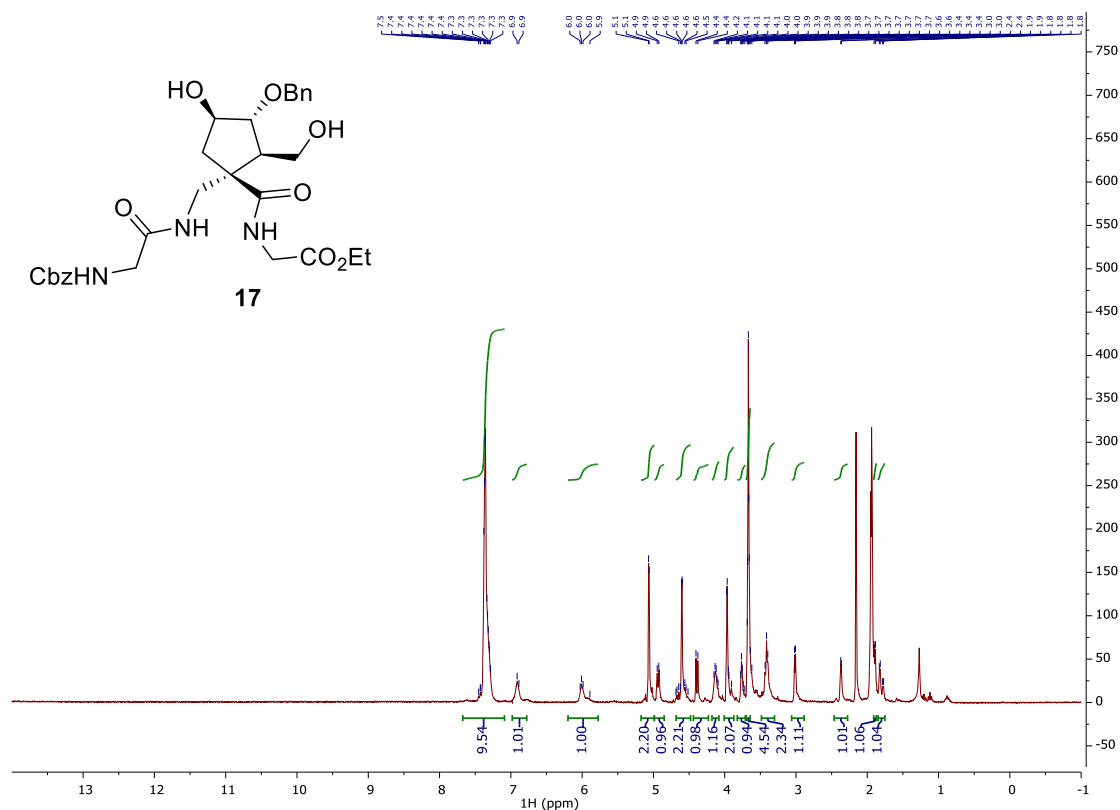

<sup>13</sup>C-NMR

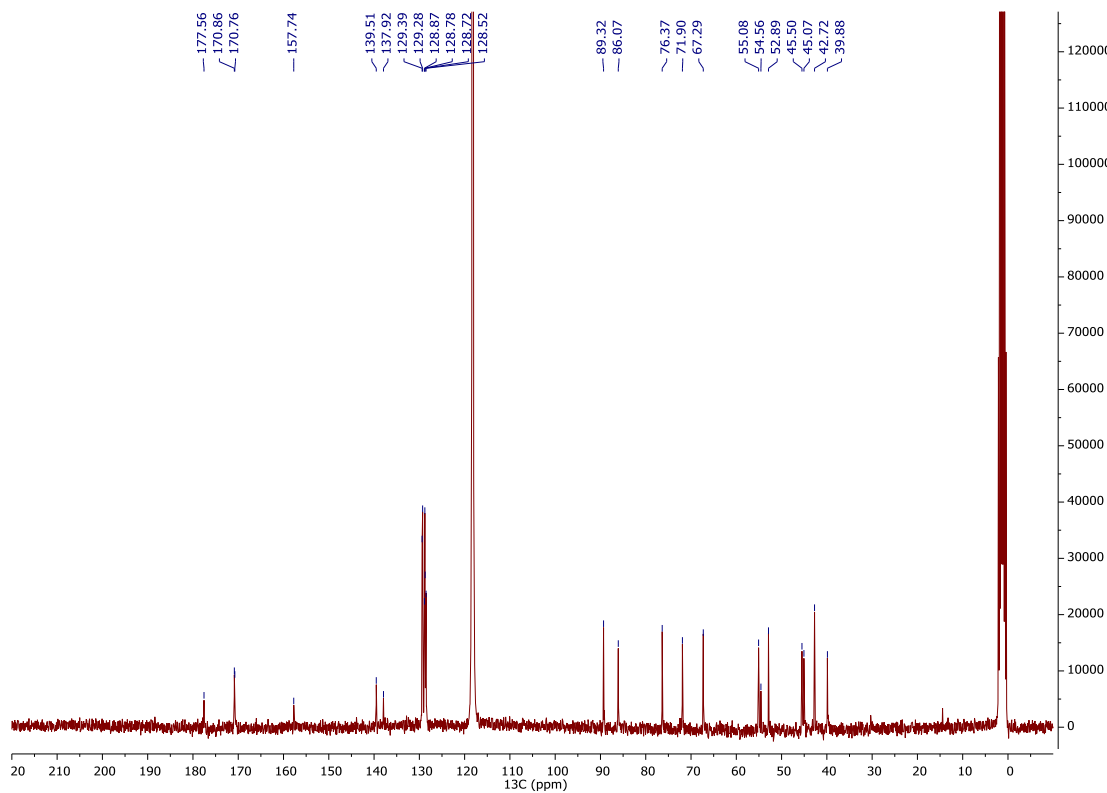

**Benzyl ((3*aR*,5*R*,6*R*,6*aR*)-6-(benzyloxy)-5-hydroxy-3-oxotetrahydro-1*H*-cyclopenta[*c*]furan-3*a*(3*H*)-yl)carbamate (36)**

**<sup>1</sup>H-NMR**

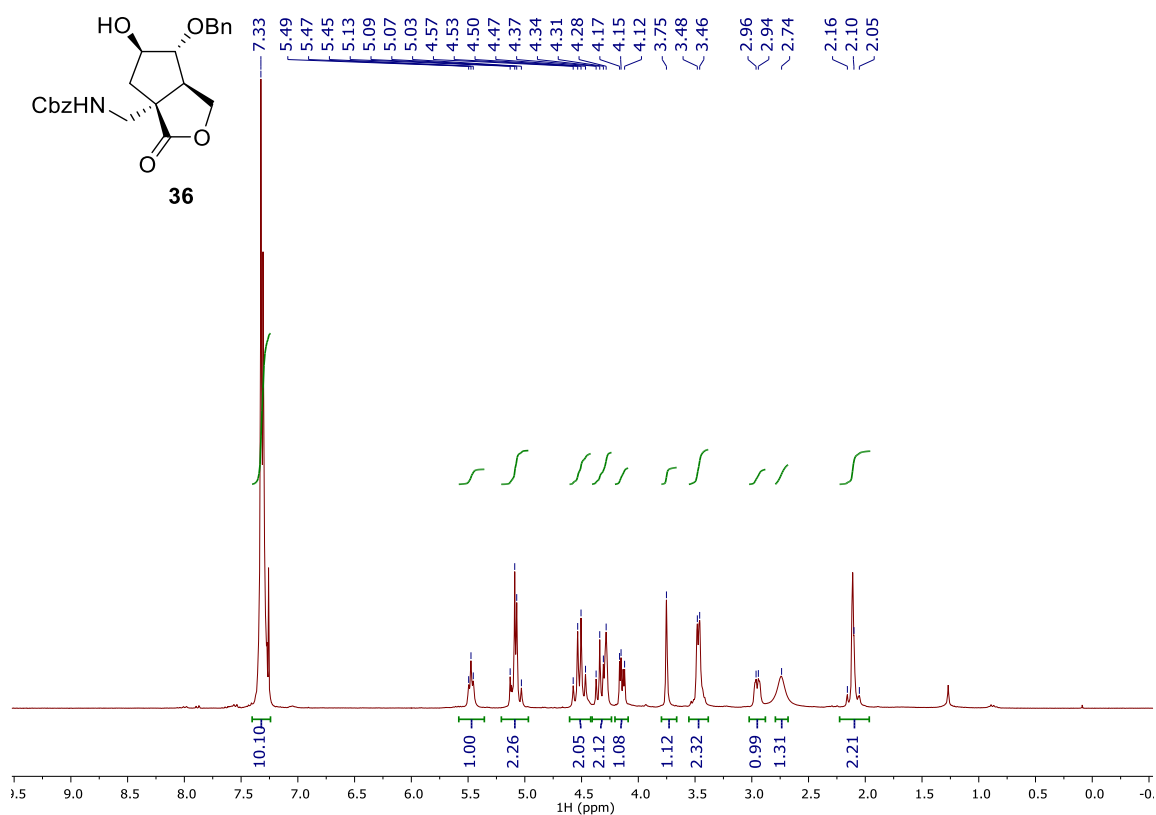

**<sup>13</sup>C-NMR**

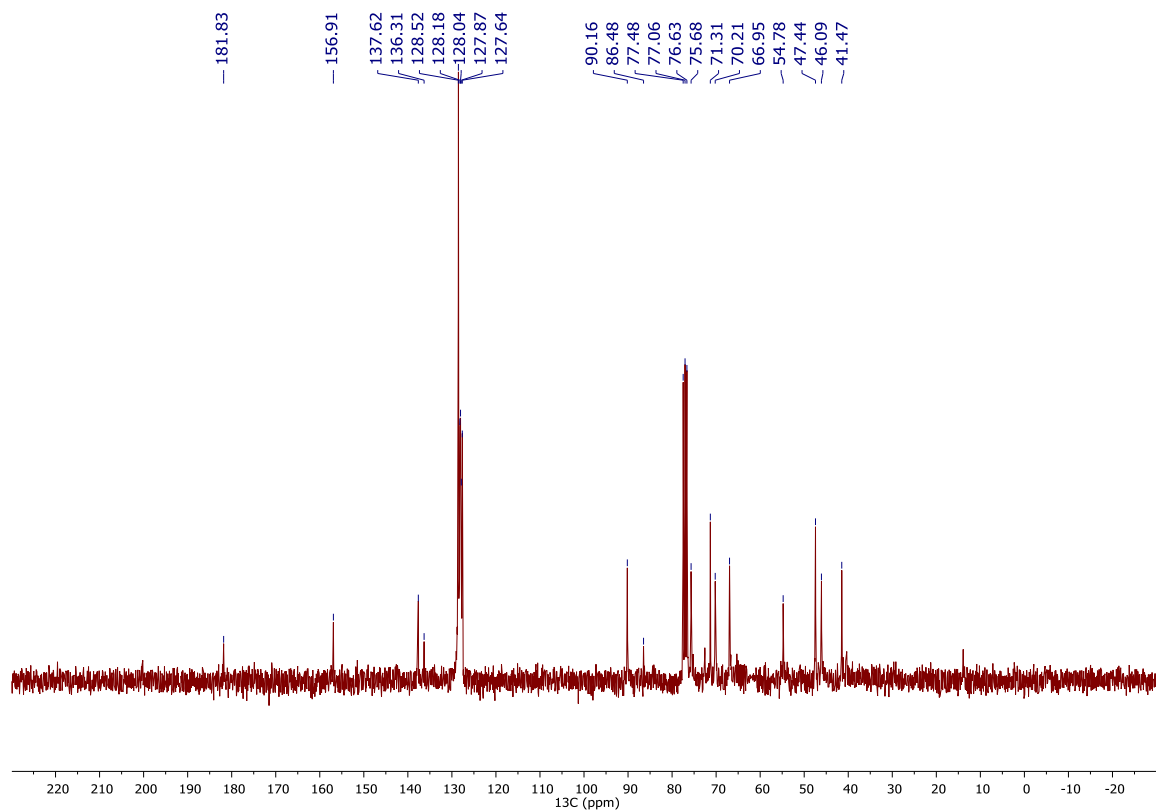

**Benzyl (((1*S*,2*R*,3*R*,4*R*)-3-(benzyloxy)-4-hydroxy-1,2-bis(hydroxymethyl)cyclopentyl)methyl)carbamate (37)**

**<sup>1</sup>H-NMR**

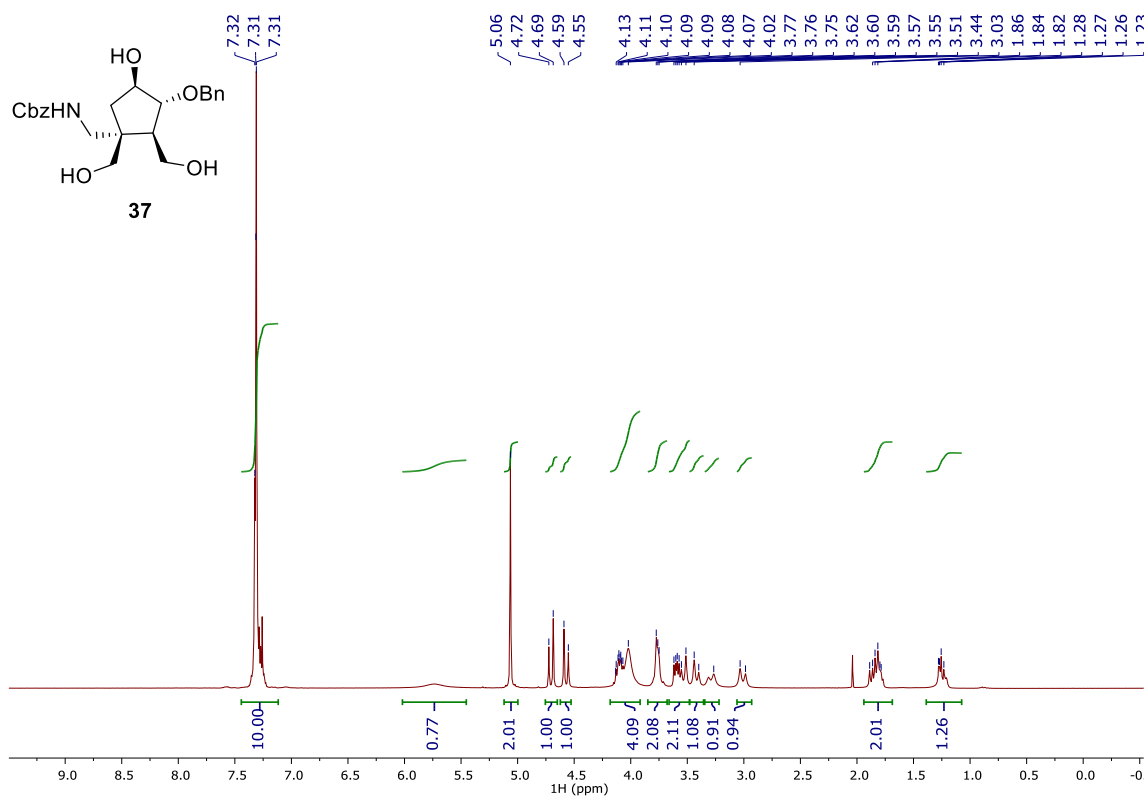

**<sup>13</sup>C-NMR**

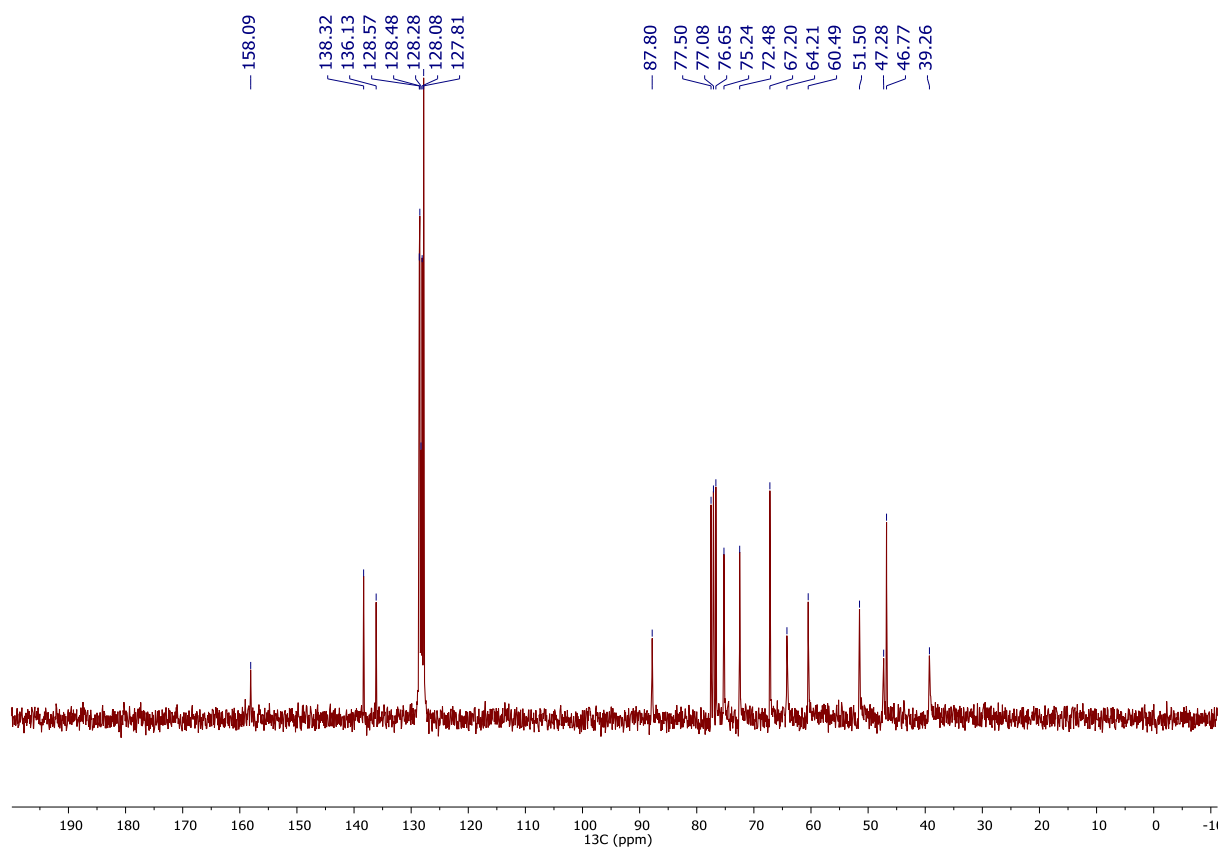

**((1*S*,2*R*,3*R*,4*R*)-3,4-dihydroxy-1,2-bis(hydroxymethyl)cyclopentyl)methanaminium chloride (38.HCl)**

**<sup>1</sup>H-NMR**

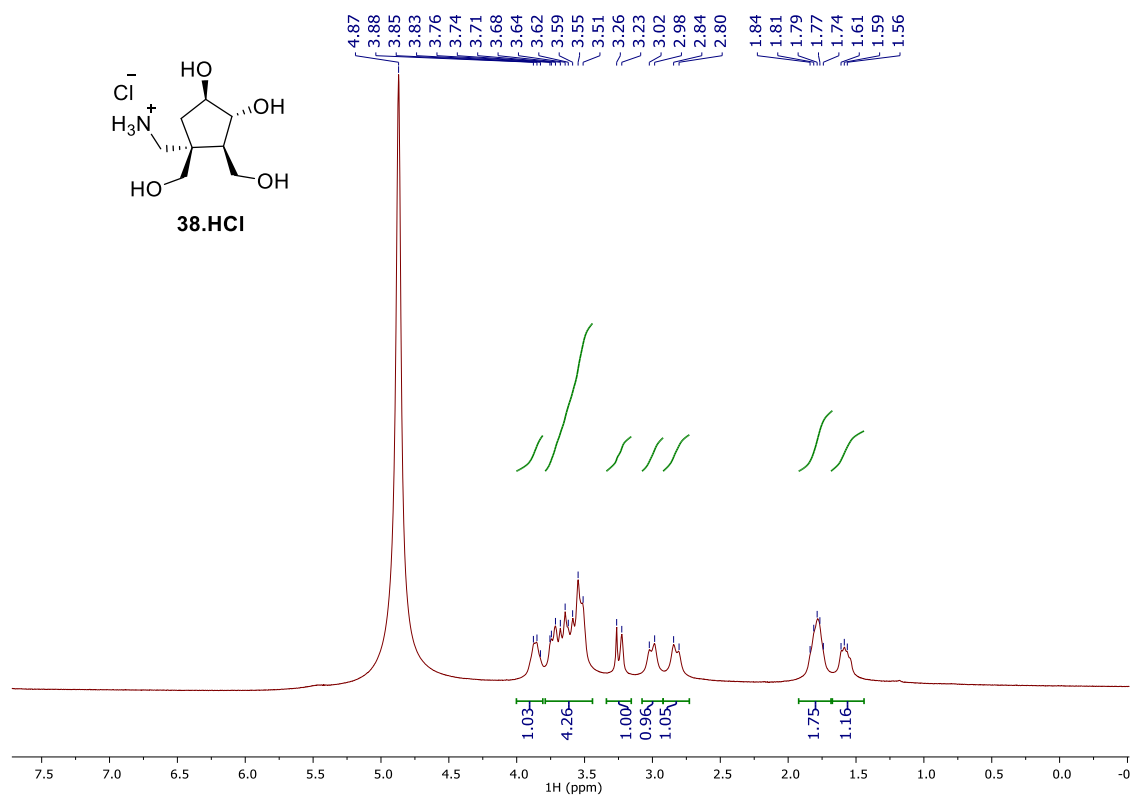

**<sup>13</sup>C-NMR**

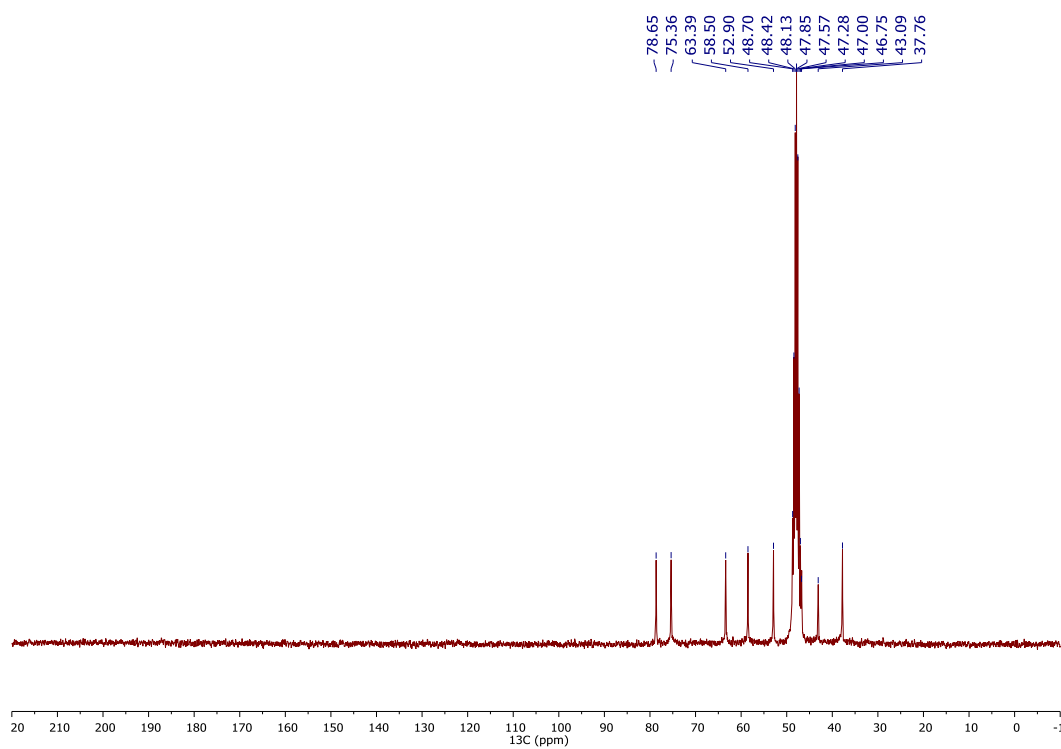

**((1*S*,2*R*,3*R*,4*R*)-3,4-dihydroxy-1,2-bis(hydroxymethyl)cyclopentyl)methanaminium chloride (38.HCl)**

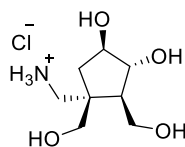

**38.HCl**

Concentration of iminosugars giving 50 % inhibition of various glycosidases

| enzyme                       | reLB0816e30 |
|------------------------------|-------------|
| $\alpha$ -glucosidase        |             |
| rice                         | NI (0%)     |
| rat intestinal maltase       | NI (0%)     |
| yeast                        | NI (0%)     |
| human lysosome               | NI (0%)     |
| $\beta$ -glucosidase         |             |
| almond                       | NI (0%)     |
| bovine liver                 | NI (18.2%)  |
| $\alpha$ -galactosidase      |             |
| coffee beans                 | NI (0%)     |
| $\beta$ -galactosidase       |             |
| bovine liver                 | NI (11.2%)  |
| $\alpha$ -mannosidase        |             |
| Jack bean                    | NI (0%)     |
| $\beta$ -mannosidase         |             |
| snail                        | NI (0%)     |
| $\alpha$ -L-fucosidase       |             |
| bovine kidney                | NI (0%)     |
| $\alpha$ -L-rhamnosidase     |             |
| <i>Penicillium decumbens</i> | NI (1.93%)  |
| Amyloglucosidase             |             |
| <i>A.niger</i>               | NI (0.617%) |
| Trehalase                    |             |
| Porcine kidney               | NI (7.71%)  |
| $\beta$ -glucuronidase       |             |
| <i>E.coli</i>                | NI (4.35%)  |
| bovine liver                 | NI (0%)     |

**Methods for the Glycosidase Inhibition Studies**

The enzymes  $\alpha$ -glucosidase (from yeast, rice),  $\beta$ -glucosidase (from almonds, bovine liver),  $\alpha$ -galactosidase (from coffee beans),  $\beta$ -galactosidase (from bovine liver),  $\alpha$ -mannosidase (from jackbeans),  $\beta$ -mannosidase (from snails),  $\alpha$ -L-fucosidase (from bovine kidney),  $\alpha$ -L-rhamnosidase (from *Penicillium decumbens*),  $\beta$ -glucuronidases (from *Escherichia coli*),  $\alpha$ -trehalase (from porcine kidney), amyloglucosidase (from *Aspergillus niger*), p-nitrophenyl glycosides, and various disaccharides were purchased from Sigma-Aldrich Co. Brush border membranes were prepared from the rat small

intestine according to the method of Kessler et al. [35], and were assayed at pH 6.8 for rat intestinal maltase using maltose. For rat intestinal glucosidases and porcine kidney trehalase activities, the reaction mixture (0.2 mL) contained 25 mM substrate and the appropriate amount of enzyme, and the incubations were performed for 10 min at 37 °C. The reaction was stopped by heating at 100 °C for 3 min. After centrifugation (600 g; 10 min), 0.035 mL of the resulting reaction mixture were added to 2.1 mL of the Glucose CII-testWako (Wako Pure Chemical Ind., Osaka, Japan). The absorbance at 505 nm was measured to determine the amount of the released D-glucose. Other glycosidase activities were determined using an appropriate p-nitrophenyl glycoside as substrate at the optimum pH of each enzyme. The reaction mixture (0.2 mL) contained 2 mM of the substrate and the appropriate amount of enzyme. The reaction was stopped by adding 0.4 mL of 400 mM Na<sub>2</sub>CO<sub>3</sub>. The released p-nitrophenol was measured spectrometrically at 400 nm.



Figure S1. Single Crystal XRD- for compound **32**,  
with thermal ellipsoids drawn at the 50% probability  
level and CCDC: 2180680

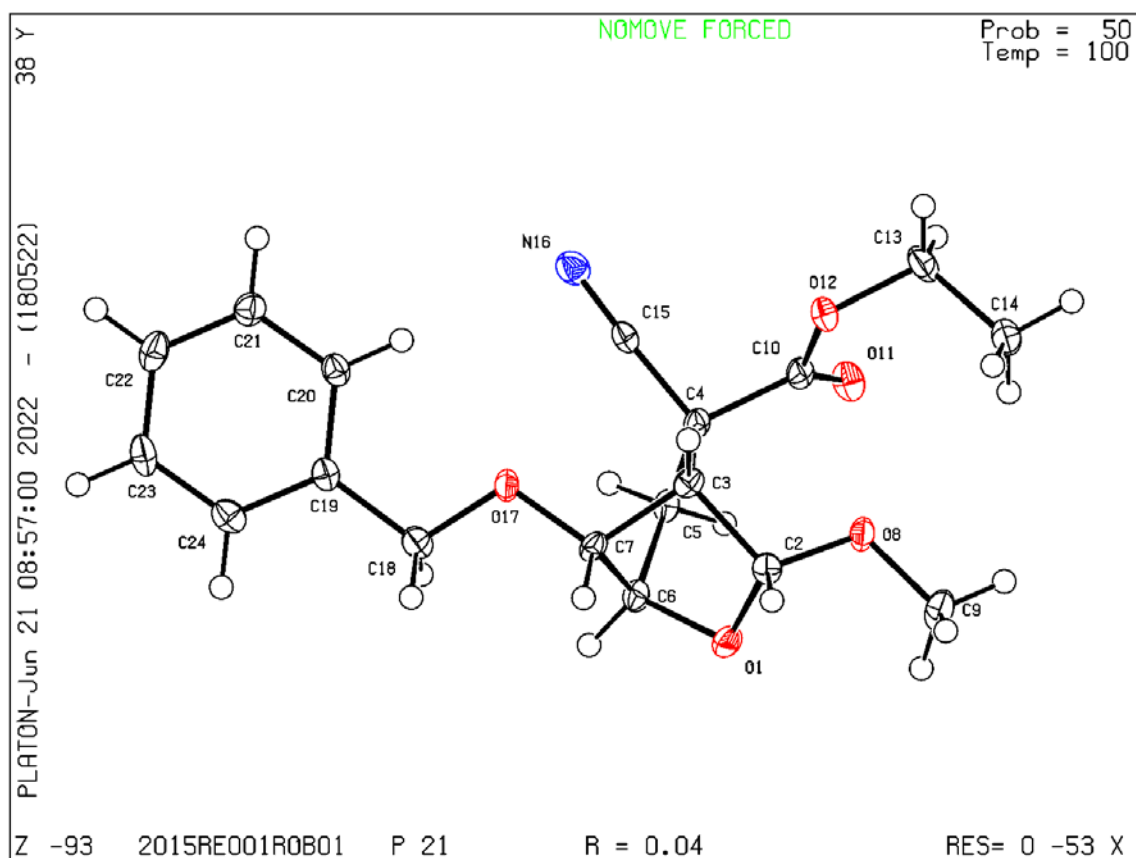

Table S2. Crystal data and structure refinement for compound **32**,  
and CCDC: 2180680

|                    |                                            |                                 |                    |
|--------------------|--------------------------------------------|---------------------------------|--------------------|
| Bond precision:    | C-C = 0.0041 Å                             |                                 | Wavelength=0.71073 |
| Cell:              | a=5.8300(5)                                | b=16.7011(12)                   | c=8.4430(6)        |
|                    | alpha=90                                   | beta=90.811(5)                  | gamma=90           |
| Temperature:       | 100 K                                      |                                 |                    |
|                    | Calculated                                 | Reported                        |                    |
| Volume             | 821.99(11)                                 | 821.99(11)                      |                    |
| Space group        | P 21                                       | P 21                            |                    |
| Hall group         | P 2yb                                      | P 2yb                           |                    |
| Moiety formula     | C18 H21 N O5                               | C18 H21 N O5                    |                    |
| Sum formula        | C18 H21 N O5                               | C18 H21 N O5                    |                    |
| Mr                 | 331.36                                     | 331.36                          |                    |
| Dx,g cm-3          | 1.339                                      | 1.339                           |                    |
| Z                  | 2                                          | 2                               |                    |
| Mu (mm-1)          | 0.098                                      | 0.098                           |                    |
| F000               | 352.0                                      | 352.0                           |                    |
| F000'              | 352.19                                     |                                 |                    |
| h,k,lmax           | 7,21,10                                    | 7,21,10                         |                    |
| Nref               | 3658[ 1893]                                | 3577                            |                    |
| Tmin,Tmax          | 0.979,0.996                                | 0.828,0.959                     |                    |
| Tmin'              | 0.960                                      |                                 |                    |
| Correction method= | # Reported T Limits: Tmin=0.828 Tmax=0.959 |                                 |                    |
| AbsCorr =          | MULTI-SCAN                                 |                                 |                    |
| Data completeness= | 1.89/0.98                                  | Theta(max)= 27.191              |                    |
| R(reflections)=    | 0.0433( 2628)                              | wR2(reflections)= 0.0801( 3577) |                    |
| S =                | 0.951                                      | Npar= 219                       |                    |
